# Supplementary material for: Wide-genome selection of lactic acid bacteria harboring genes that promote the elimination of antinutritional factors
Source: Front Plant Sci. 2023 Apr 26;14:1145041. doi: 10.3389/fpls.2023.1145041 (PMC10171302; doi:10.3389/fpls.2023.1145041)
Supplement: Supplementary Table 1 — Dispensable genes potentially involved in metabolism of ANFs of bacterial species belonged to Enterobacteriaceae. The binary analysis of each ANF-related genes was separated into sub-sheets. [file Table_1.xlsx]

## Sheet: Enterobacte (ANF-related genes)
No.	Species	Tannase						Phytase encoding gene					Lectin					Phenolic related metabolic genes							trypsin			alpha-galactosidase
1	Cronobacter_dublinensis_subsp_dublinensis_LMG_23823_NZ_CP012266	-	-	-	-	-	-	-	-	AFK67_RS09575	-	-	-	-	-	-	-	AFK67_RS02445	AFK67_RS14325	AFK67_RS04585	AFK67_RS16340	-	AFK67_RS16345	-	-	-	-	-	-	-	-	AFK67_RS00880	-
2	Cronobacter_malonaticus_LMG_23826_NZ_CP013940	-	-	-	-	-	-	-	-	AFK66_RS10055	AFK66_RS21455	-	-	-	-	-	-	AFK66_RS17075	AFK66_RS05470	AFK66_RS14770	AFK66_RS03550	-	AFK66_RS03545	-	-	AFK66_RS15105	-	-	-	-	-	AFK66_RS19945	-
3	Cronobacter_sakazakii_strain_ATCC_29544_NZ_CP011047	-	-	-	-	-	-	-	-	CSK29544_RS15705	CSK29544_RS16655	-	-	-	-	-	-	CSK29544_RS02395	CSK29544_RS10975	CSK29544_RS20825	CSK29544_RS08930	-	CSK29544_RS08925	-	-	CSK29544_RS21200	-	-	-	-	-	CSK29544_RS04025	-
4	Cronobacter_universalis_NCTC_9529_NZ_CP012257	-	-	-	-	-	-	-	-	AFK65_RS09705	AFK65_RS08540	-	-	-	-	-	-	AFK65_RS02380	AFK65_RS13790	AFK65_RS04530	AFK65_RS15330	-	AFK65_RS15335	-	-	-	-	-	-	-	-	AFK65_RS00540	-
5	Enterobacter_asburiae_strain_ATCC_35953_NZ_CP011863	-	-	-	-	-	-	-	-	ACJ69_RS14305	-	-	-	-	-	-	-	ACJ69_RS20015	ACJ69_RS11900	-	ACJ69_RS21970	-	ACJ69_RS21965	-	-	-	-	-	-	-	-	-	-
6	Enterobacter_cloacae_subsp_cloacae_ATCC_13047_NC_014121	-	-	-	-	-	-	-	-	ECL_00743	-	-	-	-	-	-	-	ECL_04502	ECL_03660	ECL_04864	ECL_04082	-	ECL_04083	-	-	-	-	-	-	-	-	ECL_05078	-
7	Enterobacter_hormaechei_ATCC_49162_NZ_MKEQ01000003	-	-	-	-	-	-	-	-	BH712_RS11385	-	-	-	-	-	-	-	BH712_RS20755	BH712_RS17060	BH712_RS18990	BH712_RS22605	-	BH712_RS22600	-	-	-	-	-	-	-	-	-	-
8	Enterobacter_kobei_strain_JCM_8580_MKXD00000000	-	-	-	-	-	-	-	-	-	-	-	-	-	-	-	-	BH713_18505	BH713_14900	BH713_13470	-	-	-	-	-	BH713_17505	-	-	-	-	-	BH713_00295	-
9	Enterobacter_ludwigii_strain_EN_119_NZ_CP017279	-	-	-	-	-	-	-	-	BH714_RS17595	-	-	BH714_RS00435	-	BH714_RS00440	-	-	BH714_RS20205	BH714_RS11990	BH714_RS14230	BH714_RS21980	-	BH714_RS21975	-	-	-	-	-	-	-	-	BH714_RS14765	-
10	Erwinia_pyrifoliae_DSM_12163_NC_017390	-	-	-	-	-	-	-	-	-	-	-	-	-	-	-	-	-	EPYR_RS06305	-	-	-	-	-	-	-	-	-	-	-	-	-	-
11	Erwinia_tasmaniensis_Et1_99_NC_010694	-	-	-	-	-	-	-	-	-	-	-	-	-	-	-	-	ETA_RS15755	ETA_RS06970	-	-	-	-	-	-	-	-	-	-	-	-	-	-
12	Escherichia_coli_DSM_30083__JCM_1649__ATCC_11775_NZ_KK583188	-	-	-	-	-	-	-	-	ESCCO_RS0123680	ESCCO_RS0118380	-	-	-	-	-	-	ESCCO_RS0106575	ESCCO_RS0111360	-	-	-	-	-	-	-	-	ESCCO_RS0101125	-	-	-	-	-
13	Escherichia_fergusonii_ATCC_35469_strain_ATCC_35469T_NC_011740	-	-	-	-	-	-	-	-	-	EFER_RS15340	-	-	-	-	-	-	EFER_RS21815	EFER_RS04375	-	EFER_RS01825	-	EFER_RS01820	-	-	-	-	-	-	-	-	-	-
14	Pantoea_stewartii_subsp_indologenes_strain_LMG_2632_NZ_JPKO01000034	-	-	-	-	-	-	-	HA47_RS06160	-	-	-	-	-	-	-	-	HA47_RS11435	HA47_RS14655	HA47_RS07595	-	-	HA47_RS05410	-	-	-	-	-	-	-	-	-	-
15	Providencia_sneebia_DSM_19967_NZ_CM001773	-	-	-	-	-	-	-	-	-	-	-	-	-	-	-	-	-	OO7_RS11490	-	-	-	-	-	-	-	-	-	-	-	-	-	-
16	Rahnella_aquatilis_CIP_78_65__ATCC_33071_NC_016818	RAHAQ2_RS23995 tannase plasmid	-	-	-	-	-	-	-	-	-	-	-	-	-	-	-	RAHAQ2_RS19455	RAHAQ2_RS06305	RAHAQ2_RS12820	-	-	-	-	-	-	-	-	-	-	-	RAHAQ2_RS00090	-
17	Salmonella_enterica_subsp_enterica_serovar_Typhimurium_str_LT2_NC_003197	-	-	-	-	-	-	-	-	-	-	-	-	-	-	-	-	STM3233	STM2356	-	STM2922	-	STM2921	-	-	-	-	STM4298	-	-	-	-	-
18	Serratia_liquefaciens_ATCC_27592_NC_021741	-	-	-	-	-	-	-	-	M495_RS04275	-	-	-	-	-	-	-	M495_RS21380	M495_RS16755	-	-	-	-	-	-	-	-	M495_RS15490	-	-	-	-	-
19	Sodalis_praecaptivus_strain_HS1_NZ_CP006569	-	-	-	-	-	-	-	-	-	-	-	-	-	-	-	-	SANT_RS18715	SANT_RS06660	-	-	-	-	-	-	-	-	SANT_RS03635	-	-	-	SANT_RS07570	-
20	Tatumella_morbirosei_strain_LMG_23360_NZ_JPKR02000005	-	-	-	-	-	-	-	-	-	-	-	-	-	-	-	-	HA49_RS11165	HA49_RS07805	-	-	-	-	-	-	-	-	-	-	-	-	-	-
21	Xenorhabdus_doucetiae_strain_FRM16_NZ_FO704550	-	-	-	-	-	-	-	-	-	-	-	-	-	-	-	-	-	XDD1_RS12275	-	-	-	-	-	XDD1_RS09885	-	-	-	-	-	-	-	-
22	Xenorhabdus_nematophila_ATCC_19061_NC_014228	-	-	-	-	-	-	-	-	-	-	-	-	-	-	XNC1_RS08550	XNC1_RS08945	-	XNC1_RS13220	-	-	-	-	-	XNC1_RS09475	-	XNC1_RS10175	-	-	-	-	-	-
23	Yersinia_enterocolitica_subsp_palearctica_Y11_NC_017564	-	-	-	-	-	-	-	-	-	Y11_RS06930	-	-	-	-	-	-	Y11_RS12235	Y11_RS00895	-	-	-	-	-	-	-	-	-	-	-	-	-	-
24	Yersinia_similis_strain_228_NZ_CP007230	-	-	-	-	-	-	-	-	-	BF17_RS20270	-	-	-	-	-	-	-	BF17_RS21420	-	-	-	-	-	-	-	-	-	-	-	-	-	-
25	Arsenophonus_nasoniae_DSM_15247_NZ_AUCC01000302	-	-	-	-	-	-	-	-	-	-	-	-	-	-	-	-	-	G468_RS0108095	G468_RS0109415	-	-	-	-	-	-	-	-	-	-	-	-	-
26	Atlantibacter_hermannii_NBRC_105704_BAFF00000000	-	-	-	-	-	-	-	-	-	-	-	-	-	-	-	-	EH105704_14_00540	EH105704_01_07550	-	-	-	-	-	-	-	-	-	-	-	-	-	-
27	Budvicia_aquatica_DSM_5075__ATCC_35567_NZ_ATYS01000110	-	-	-	-	-	-	-	-	-	YWE_RS0117805	-	-	-	-	-	-	YWE_RS0121405	YWE_RS0118240	-	-	-	-	-	-	-	-	YWE_RS0106045	-	-	-	-	-
28	Buttiauxella_agrestis_ATCC_33320_NZ_JMPI01000093	-	-	-	-	-	-	-	-	GBAG_RS08945	-	-	-	-	-	-	-	GBAG_RS02105	GBAG_RS14205	-	-	-	-	-	-	-	-	-	-	-	-	GBAG_RS19145	-
29	Buttiauxella_brennerae_ATCC_51605_NZ_LXER01000088	-	-	-	-	-	-	-	-	M975_RS07030	M975_RS15810	-	-	-	-	-	-	M975_RS21680	M975_RS12750	M975_RS13225	-	-	-	-	-	-	-	M975_RS09010	-	-	-	-	-
30	Buttiauxella_ferragutiae_ATCC_51602_NZ_LXEQ01000089	-	-	-	-	-	-	-	-	M976_RS17165	M976_RS07665	-	-	-	-	-	-	M976_RS01690	M976_RS11285	-	-	-	-	-	-	-	-	M976_RS09135	-	M976_RS10295	M976_RS20460	-	-
31	Buttiauxella_gaviniae_ATCC_51604_NZ_LXEP01000133	-	-	-	-	-	-	-	-	M977_RS21150	M977_RS07925	-	-	-	-	-	-	M977_RS13610	M977_RS04885	-	-	-	-	-	-	-	-	-	-	-	-	-	-
32	Buttiauxella_noackiae_ATCC_51607_NZ_LXEO01000104	-	-	-	-	-	-	-	-	M979_RS05880	M979_RS14405	-	-	-	-	-	-	M979_RS20290	M979_RS11180	-	-	-	-	-	-	-	-	-	-	-	-	-	-
33	Cedecea_davisae_DSM_4568_NZ_KE161033	-	-	-	-	-	-	-	-	HMPREF0201_RS10285	-	-	-	-	-	-	-	HMPREF0201_RS01455	HMPREF0201_RS14480	-	-	-	-	-	-	-	-	-	-	HMPREF0201_RS15885	-	-	-
34	Cedecea_neteri_NBRC_105707__ATCC_33855_NZ_BCTL01000139	-	-	-	-	-	-	-	-	-	-	-	-	-	-	-	-	CNE01S_RS06320	CNE01S_RS07875	-	-	-	-	-	-	-	-	-	-	-	-	-	-
35	Citrobacter_freundii_NBRC_12681_NZ_BBMV01000001	-	-	-	-	-	-	-	-	-	-	-	-	-	-	-	-	CIFRE_RS14785	CIFRE_RS09090	-	CIFRE_RS11235	-	CIFRE_RS11240	-	-	-	-	CIFRE_RS17560	-	-	-	-	-
36	Citrobacter_pasteurii_strain_CIP_55_13_NZ_CDHL01000056	-	-	-	-	-	-	-	-	-	-	-	-	-	-	-	-	CIT5513_RS04000	CIT5513_RS07770	-	CIT5513_RS13155	-	CIT5513_RS13150	-	-	-	-	-	-	-	-	-	-
37	Citrobacter_rodentium_NBRC_105723_NZ_BBNA01000001	-	-	-	-	-	-	-	-	-	-	-	-	-	-	-	-	-	CRO01S_RS05965	CRO01S_RS01595	CRO01S_RS10685	-	CRO01S_RS10690	-	-	-	-	-	-	-	-	-	-
38	Citrobacter_sedlakii_NBRC_105722_NZ_BBNB01000001	-	-	-	-	-	-	-	-	-	-	-	-	-	-	-	-	CSE01S_RS21215	CSE01S_RS16380	CSE01S_RS08195	CSE01S_RS12140	-	CSE01S_RS12145	-	-	-	-	CSE01S_RS17370	-	-	-	-	-
39	Citrobacter_werkmanii_NBRC_105721_NZ_BBMW01000001	-	-	-	-	-	-	-	-	-	-	-	-	-	-	-	-	CIWKM_RS14595	CIWKM_RS01545	CIWKM_RS16820	CIWKM_RS12890	-	CIWKM_RS12895	-	-	-	-	-	-	-	-	-	-
40	Cosenzaea_myxofaciens_ATCC_19692_NZ_LXEN01000293	-	-	-	-	-	-	-	-	-	-	-	-	-	-	-	-	-	M983_RS03030	-	-	-	-	-	-	-	-	-	-	-	-	-	-
41	Cronobacter_condimenti_1330_NZ_CAKW01000001	-	-	-	-	-	-	-	-	BN137_RS16400	-	-	-	-	-	-	-	BN137_RS19100	BN137_RS15830	BN137_RS02365	BN137_RS18485	-	BN137_RS18480	-	-	-	-	-	-	-	-	BN137_RS14435	-
42	Cronobacter_dublinensis_subsp_lactaridi_LMG_23825_NZ_AJKX01000095	-	-	-	-	-	-	-	-	UOO_RS0109385	-	-	-	-	-	-	-	UOO_RS0118435	UOO_RS0105075	UOO_RS0114290	UOO_RS0101525	-	UOO_RS0101530	-	-	-	-	-	-	-	-	UOO_RS0119850	-
43	Cronobacter_dublinensis_subsp_lausannensis_LMG_23824_NZ_AJKY01000105	-	-	-	-	-	-	-	-	UOS_RS0113235	-	-	-	-	-	-	-	UOS_RS0106720	UOS_RS0108555	UOS_RS0118740	UOS_RS0102670	-	UOS_RS0102675	-	-	-	-	-	-	-	-	UOS_RS0101660	-
44	Cronobacter_muytjensii_ATCC_51329_NZ_CP012268	-	-	-	-	-	-	-	-	AFK63_RS09130	-	-	-	-	-	-	-	AFK63_RS16125	AFK63_RS04475	AFK63_RS14055	AFK63_RS02875	-	AFK63_RS02870	-	-	-	-	-	-	-	-	AFK63_RS17740	-
45	Dickeya_chrysanthemi_NCPPB_402_NZ_AOOA01000077	-	-	-	-	-	-	-	DCH402_RS20220	DCH402_RS11735	-	-	-	-	-	-	-	DCH402_RS17630	DCH402_RS06470	DCH402_RS10320	-	-	-	-	-	-	-	-	-	-	-	DCH402_RS07365	-
46	Dickeya_dadantii_NCPPB_898_NZ_AOOE01000052	-	-	-	-	-	-	-	DDA898_RS00660	DDA898_RS12370	-	-	-	-	-	-	-	DDA898_RS03175	DDA898_RS14635	DDA898_RS11145	-	-	-	-	-	-	-	-	-	-	-	DDA898_RS07825	-
47	Dickeya_dianthicola_NCPPB_453_NZ_AOOB01000052	-	-	-	DDI453_RS21465	-	-	-	DDI453_RS0100360	DDI453_RS0111775	-	-	-	-	-	-	-	DDI453_RS21270	DDI453_RS0114055	DDI453_RS0110560	-	-	-	-	-	-	-	-	-	-	-	DDI453_RS0107465	-
48	Dickeya_paradisiaca_NCPPB_2511_NZ_CM001857	-	-	-	-	-	-	-	DPA2511_RS20245	DPA2511_RS10755	-	-	-	-	-	-	-	DPA2511_RS17405	DPA2511_RS13200	-	-	-	-	-	-	-	-	-	-	-	-	DPA2511_RS06830	-
49	Dickeya_solani_IPO_2222_NZ_CP015137	-	-	-	-	-	-	-	A4U42_RS08545	A4U42_RS00020	-	-	-	-	-	-	-	A4U42_RS11970	A4U42_RS01995	A4U42_RS19830	-	-	-	-	-	-	-	-	-	-	-	A4U42_RS16880	-
50	Dickeya_zeae_NCPPB_2538_NZ_AOOF01000046	-	-	-	-	-	-	-	DZE2538_RS19440	DZE2538_RS08040	-	-	-	-	-	-	-	DZE2538_RS02755	DZE2538_RS13055	DZE2538_RS09275	-	-	-	-	-	-	-	-	-	-	-	DZE2538_RS11845	-
51	Edwardsiella_hoshinae_NBRC_105699__ATCC_33379_NZ_BAUC01000001	-	-	-	-	-	-	-	-	-	EHO01S_RS08905	EHO01S_RS04970	-	-	-	-	-	-	EHO01S_RS02855	-	-	-	-	-	-	-	-	EHO01S_RS00500	-	-	-	-	EHO01S_RS10435
52	Edwardsiella_ictaluri_ATCC_33202_NZ_AFJI01000117	-	-	-	-	-	-	EIEH_RS05460	-	-	EIEH_RS11035	EIEH_RS05460	-	-	-	-	-	-	EIEH_RS13130	-	-	-	-	-	-	-	-	EIEH_RS06350	-	-	-	-	EIEH_RS07520
53	Edwardsiella_tarda_ATCC_15947__NBRC_105688_NZ_BANW01000001	-	-	-	-	-	-	ET1_RS12650	-	-	ET1_RS00780	ET1_RS12650	-	-	-	-	-	-	ET1_RS05700	-	-	-	-	-	-	-	-	ET1_RS04125	-	-	-	-	ET1_RS11895
54	Edwardsiella_tarda_strain_ET883_NZ_JRGQ01000167	-	-	-	-	-	-	KP73_RS02570	-	-	KP73_RS14030	KP73_RS02570	-	-	-	-	-	-	KP73_RS00060	-	-	-	-	-	-	-	-	-	-	-	-	-	KP73_RS09820
55	Enterobacter_hormaechei_subsp_oharae_strain_DSM_16687_NZ_CP017180	-	-	-	-	-	-	-	-	BFV66_RS03020	-	-	-	-	-	-	-	BFV66_RS19300	BFV66_RS11055	BFV66_RS21170	BFV66_RS17345	-	BFV66_RS17350	-	-	-	-	-	-	-	-	BFV66_RS22220	-
56	Enterobacter_hormaechei_subsp_steigerwaltii_strain_DSM_16691_NZ_CP017179	-	-	-	-	-	-	-	-	BFV68_RS02960	-	-	-	-	-	-	-	BFV68_RS19495	BFV68_RS15495	BFV68_RS21300	BFV68_RS17510	-	BFV68_RS17515	-	-	-	-	-	-	-	-	BFV68_RS22205	-
57	Enterobacter_mori_LMG_25706_NZ_AEXB01000139	-	-	-	-	-	-	-	ENTMO_RS0104760	ENTMO_RS0103225	-	-	-	-	-	-	-	ENTMO_RS0121145	ENTMO_RS0116455	ENTMO_RS0122690	ENTMO_RS0119125	-	ENTMO_RS0119130	-	-	-	-	-	-	-	-	ENTMO_RS0123255	-
58	Enterobacter_soli_ATCC_BAA_2102_NZ_LXES01000074	-	-	-	-	-	-	-	-	-	-	-	-	-	-	-	-	M987_RS02415	M987_RS21330	M987_RS04425	M987_RS00775	M987_RS13645	M987_RS00780	-	-	-	-	-	-	-	-	M987_RS05425	-
59	Erwinia_amylovora_NBRC_12687_NZ_BAYW01000001	-	-	-	-	-	-	-	-	-	-	-	-	-	-	-	-	-	EAM01S_RS12230	-	-	-	-	-	-	-	-	-	-	-	-	-	-
60	Erwinia_iniecta_strain_B120_NZ_JRXE01000092	-	-	-	-	-	-	-	NG42_RS10420	-	-	-	-	-	-	-	-	NG42_RS21050	NG42_RS02010	NG42_RS19425	-	-	-	-	-	-	-	NG42_RS12440	-	-	-	-	-
61	Erwinia_oleae_strain_DAPP_PG531_NZ_JNVB01000099	-	-	-	-	-	-	-	-	-	-	-	-	-	-	-	-	GS12_RS05170	GS12_RS04770	-	-	-	-	-	-	-	-	-	GS12_RS15895	-	-	-	-
62	Erwinia_persicina_NBRC_102418_NZ_BCTN01000066	-	-	-	-	-	-	-	EPE01S_RS17800	-	-	-	-	-	-	-	-	EPE01S_RS12675	EPE01S_RS02470	EPE01S_RS04095	-	-	-	-	-	-	-	EPE01S_RS00695	-	-	-	-	-
63	Erwinia_piriflorinigrans_CFBP_5888_NZ_CAHS01000025	-	-	-	-	-	-	-	-	-	-	-	-	-	-	-	-	EPIR_RS15075	EPIR_RS11785	-	-	-	-	-	-	-	-	-	-	-	-	-	-
64	Escherichia_albertii_TW07627_NZ_CH991859	-	-	-	-	-	-	-	-	-	ESCAB7627_RS17410	-	-	-	-	-	-	ESCAB7627_RS11400	ESCAB7627_RS15655	-	ESCAB7627_RS13655	-	ESCAB7627_RS13650	-	-	-	-	-	-	-	-	-	-
65	Escherichia_vulneris_NBRC_102420_NZ_BBMZ01000001	-	-	-	-	-	-	-	-	-	-	-	-	-	-	-	-	EV102420_RS06585	EV102420_RS04665	EV102420_RS15125	-	-	-	-	-	-	-	-	-	-	-	EV102420_RS17635	-
66	Ewingella_americana_ATCC_33852_NZ_JMPJ01000092	-	-	-	-	-	-	-	-	-	-	-	-	-	-	-	-	GEAM_RS00565	GEAM_RS12125	-	-	-	-	-	-	-	-	-	-	-	-	-	-
67	Franconibacter_helveticus_LMG_23732_NZ_AWFX01000057	-	-	-	-	DW56_RS06335	-	-	-	DW56_RS10840	-	-	-	-	-	-	-	DW56_RS00660	DW56_RS13545	DW56_RS02815	DW56_RS07530	-	DW56_RS07525	-	-	-	-	-	-	-	-	DW56_RS09385	-
68	Franconibacter_pulveris_DSM_19144_NZ_JHYZ01000036	-	-	-	-	-	-	-	-	Q370_RS0114695	-	-	-	-	-	-	-	Q370_RS0119360	Q370_RS0121765	Q370_RS0116995	Q370_RS0121055	-	Q370_RS0121050	-	-	-	-	-	-	-	-	Q370_RS0103530	-
69	Hafnia_alvei_ATCC_13337_NZ_JMPK01000161	-	-	-	-	-	-	GHAL_RS10280	-	-	GHAL_RS12610	-	-	-	-	-	-	GHAL_RS06895	GHAL_RS17375	-	-	-	-	-	-	-	-	-	-	-	-	-	-
70	Hafnia_paralvei_ATCC_29927_NZ_LXET01000086	-	-	-	-	-	-	M988_RS13465	-	-	M988_RS11515	-	-	-	-	-	-	M988_RS17130	M988_RS06560	M988_RS10650	-	-	-	-	-	-	-	-	-	-	-	-	-
71	Klebsiella_aerogenes_KCTC_2190_NC_015663	-	-	-	-	-	-	-	EAE_02525	-	-	-	-	-	-	-	-	EAE_04055	EAE_24555	EAE_05705	EAE_01820	-	EAE_01825	-	-	-	-	EAE_08760	-	-	-	-	-
72	Klebsiella_oxytoca_NBRC_105695_NZ_BCZK01000043	-	-	-	-	-	-	-	KO1_RS21355	-	-	-	-	-	-	-	-	KO1_RS25450	KO1_RS08555	KO1_RS07500	KO1_RS21775	-	KO1_RS21770	-	-	-	-	KO1_RS22355	-	-	-	KO1_RS23215	-
73	Klebsiella_pneumoniae_strain_ATCC_13883_NZ_KN046822	-	-	-	-	-	-	-	DR88_RS19325	-	-	-	-	-	-	-	-	DR88_RS10200	DR88_RS05865	DR88_RS03695	DR88_RS07965	-	DR88_RS07970	-	-	-	-	DR88_RS23685	-	-	-	DR88_RS01945	-
74	Klebsiella_pneumoniae_subsp_ozaenae_NBRC_105683_NZ_BCZL01000154	-	-	-	-	-	-	-	-	-	-	-	-	-	-	-	-	KPOZ1_RS05945	KPOZ1_RS12855	-	KPOZ1_RS08560	-	KPOZ1_RS08565	-	-	-	-	KPOZ1_RS09860	-	-	-	KPOZ1_RS16860	-
75	Klebsiella_pneumoniae_subsp_rhinoscleromatis_ATCC_13884_NZ_GG703522	-	-	-	-	-	-	-	-	-	-	-	-	-	-	-	-	-	HMPREF0484_RS22165	HMPREF0484_RS09015	HMPREF0484_RS18340	-	HMPREF0484_RS18335	-	-	-	-	HMPREF0484_RS05075	-	-	-	HMPREF0484_RS0127165	-
76	Klebsiella_quasipneumoniae_subsp_quasipneumoniae_strain_01A030_NZ_CCDF01000065	-	KQQSB11_RS23835	-	-	-	-	-	KQQSB11_RS03805	-	-	-	-	-	-	-	-	KQQSB11_RS19755	KQQSB11_RS15410	KQQSB11_RS21855	KQQSB11_RS17390	-	KQQSB11_RS17395	-	-	-	-	KQQSB11_RS24130	-	-	KQQSB11_RS18905	KQQSB11_RS00235	-
77	Klebsiella_quasipneumoniae_subsp_similipneumoniae_strain_07A044_NZ_CBZR010000046	-	SB30_RS01305	-	-	-	-	-	SB30_RS19325	-	-	-	-	-	-	-	-	SB30_RS05065	SB30_RS09165	SB30_RS03540	SB30_RS07280	-	SB30_RS07275	-	-	-	-	SB30_RS01040	-	-	-	SB30_RS23395	-
78	Klebsiella_variicola_strain_DSM_15968_NZ_CP010523	-	SP68_RS24095	-	-	-	-	-	SP68_RS18740	-	-	-	-	-	-	-	-	SP68_RS02905	SP68_RS07170	SP68_RS01315	SP68_RS05045	-	SP68_RS05040	-	-	-	-	SP68_RS23805	-	-	-	SP68_RS25310	-
79	Kluyvera_ascorbata_ATCC_33433_NZ_JMPL01000253	-	-	-	-	-	-	-	-	-	-	-	-	-	-	-	-	GKAS_RS18685	GKAS_RS05495	GKAS_RS13340	GKAS_RS06995	-	GKAS_RS06990	GKAS_RS13005	-	GKAS_RS22670	-	GKAS_RS21840	-	-	-	-	-
80	Kluyvera_cryocrescens_NBRC_102467_NZ_BCTM01000101	-	-	-	-	-	-	-	-	-	-	-	-	-	-	-	-	KCR01S_RS07725	KCR01S_RS16790	KCR01S_RS10245	KCR01S_RS19740	-	KCR01S_RS19745	-	-	-	-	KCR01S_RS04600	-	-	-	-	-
81	Kluyvera_georgiana_ATCC_51603_NZ_LXEU01000163	-	-	-	-	-	-	-	-	-	-	-	-	-	-	-	-	M989_RS03575	M989_RS07365	M989_RS01935	M989_RS05490	-	M989_RS05485	-	-	-	-	M989_RS22700	-	-	M989_RS15930	-	-
82	Kluyvera_intermedia_NBRC_102594__ATCC_33110_NZ_BCYS01000109	-	-	-	-	-	-	-	-	-	-	-	-	-	-	-	-	KIN01S_RS05635	KIN01S_RS01895	KIN01S_RS20390	KIN01S_RS08780	-	KIN01S_RS08785	-	-	-	-	KIN01S_RS15735	-	-	-	-	-
83	Kosakonia_oryzae_strain_Ola_51_NZ_CP014007	-	-	-	-	-	-	-	-	-	-	-	-	-	-	-	-	AWR26_RS02945	AWR26_RS07955	AWR26_RS01295	AWR26_RS04815	-	AWR26_RS04810	-	-	-	-	-	-	-	-	-	-
84	Kosakonia_sacchari_SP1_CP007215	-	-	-	-	-	-	-	-	-	C813_02725	-	-	-	-	-	-	C813_18510	C813_23010	C813_16845	-	-	-	-	-	-	-	-	-	-	-	-	-
85	Leclercia_adecarboxylata_ATCC_23216__NBRC_102595_NZ_BCNP01000071	-	-	-	-	-	-	-	-	-	-	-	-	-	-	-	-	LCADC_RS08495	LCADC_RS01015	-	-	LCADC_RS20445	LCADC_RS20445	-	-	-	-	-	-	-	-	LCADC_RS17110	-
86	Lelliottia_amnigena_NBRC_105700_NZ_BCNN01000020	-	-	-	-	-	-	-	-	-	-	-	-	-	-	-	-	ENTAMN1_RS00800	ENTAMN1_RS11945	-	-	-	-	-	-	-	-	-	-	-	-	ENTAMN1_RS19060	-
87	Leminorella_grimontii_ATCC_33999__DSM_5078_NZ_JMPN01000057	-	-	-	-	-	-	-	-	GLGR_RS12650	-	-	-	-	-	-	-	GLGR_RS12085	GLGR_RS09210	-	GLGR_RS14805	-	GLGR_RS14800	-	-	-	-	-	-	-	-	-	-
88	Lonsdalea_quercina_strain_ATCC_29281_NZ_FNQS01000022	-	BLU64_RS05895	BLU64_RS00690	-	-	-	-	BLU64_RS10790	-	-	-	-	-	-	-	-	BLU64_RS14005	BLU64_RS06205	-	-	-	-	-	-	-	-	-	-	-	-	-	-
89	Mangrovibacter_phragmitis_strain_MP23_NZ_LYRP01000050	-	-	-	-	-	-	-	A9B99_RS10735	A9B99_RS00830	-	-	-	-	-	-	-	A9B99_RS19690	A9B99_RS07525	A9B99_RS19100	A9B99_RS21095	-	-	-	-	-	-	A9B99_RS14215	-	-	-	-	-
90	Moellerella_wisconsensis_ATCC_35017_NZ_LGAA01000108	-	-	-	-	-	-	-	-	-	-	-	-	-	-	-	-	-	M992_RS07955	-	-	-	-	-	-	-	-	M992_RS07645	-	-	-	M992_RS10425	-
91	Morganella_morganii_subsp_morganii_NBRC_3848_NZ_BCZU01000025	-	-	-	-	-	-	-	-	-	-	-	-	-	-	-	-	-	MM4_RS00940	-	-	-	-	-	-	-	-	-	-	-	-	-	-
92	Pantoea_agglomerans_NBRC_102470_NZ_BCZA01000025	-	-	-	-	-	-	-	PAG01S_RS07950	PAG01S_RS12705	-	-	-	-	-	-	-	PAG01S_RS10105	PAG01S_RS11245	PAG01S_RS17770	-	-	-	-	-	-	-	-	-	-	-	-	-
93	Pantoea_ananatis_LMG_2665_NZ_JFZU01000028	-	-	-	-	-	-	-	CM04_RS0101950	-	-	-	-	-	-	-	-	CM04_RS0116940	CM04_RS0111715	CM04_RS0120245	CM04_RS0105585	-	CM04_RS0105580	-	-	-	-	CM04_RS0115650	-	-	-	-	-
94	Pectobacterium_atrosepticum_strain_NCPPB_549_NZ_JQHK01000060	-	-	-	-	-	-	-	JV34_RS18500	JV34_RS18810	-	-	-	-	-	-	-	JV34_RS07465	JV34_RS09065	JV34_RS14150	JV34_RS02605	-	-	-	-	-	-	-	-	-	-	JV34_RS06950	-
95	Pectobacterium_betavasculorum_strain_NCPPB_2795_NZ_JQHM01000093	-	-	-	-	-	-	-	KP22_RS18700	KP22_RS08510	-	-	-	-	-	-	-	KP22_RS09830	KP22_RS12480	KP22_RS14690	-	-	-	-	-	-	-	-	-	-	-	-	-
96	Pectobacterium_carotovorum_subsp_brasiliense_strain_LMG_21371_NZ_JQOE01000109	-	-	-	-	-	-	-	KS44_RS16055	KS44_RS07230	-	-	-	-	-	-	-	KS44_RS01180	KS44_RS13915	KS44_RS20455	-	-	-	-	-	-	-	-	-	-	-	KS44_RS00580	-
97	Pectobacterium_carotovorum_subsp_carotovorum_strain_NCPPB_312_NZ_JQHJ01000055	-	-	-	-	-	-	-	JV33_RS14890	JV33_RS08200	-	-	-	-	-	-	-	JV33_RS03150	JV33_RS05235	-	-	-	-	-	-	-	-	-	-	-	-	JV33_RS03765	-
98	Pectobacterium_carotovorum_subsp_odoriferum_strain_NCPPB_3839_NZ_JQOG01000156	-	-	-	-	-	-	-	-	KS43_RS20500	-	-	-	-	-	-	-	KS43_RS10105	KS43_RS10495	KS43_RS05390	-	-	-	-	-	-	-	KS43_RS17375	-	-	-	-	-
99	Pectobacterium_parmentieri_strain_RNS08_42_1A_NZ_JMDL01000026	-	-	-	-	-	-	-	DH18_RS0118960	DH18_RS0102990	-	-	-	-	-	-	-	DH18_RS0101440	DH18_RS0105325	DH18_RS0121645	DH18_RS0114755	-	-	-	-	-	-	-	-	-	-	DH18_RS0102010	-
100	Pectobacterium_wasabiae_CFBP_3304_NZ_CP015750	-	-	-	-	-	-	-	A7983_RS06065	A7983_RS12540	-	-	-	-	-	-	-	A7983_RS11060	A7983_RS00995	A7983_RS08245	-	-	-	-	-	-	-	-	-	-	-	-	-
101	Plesiomonas_shigelloides_strain_NCTC10360_NZ_LT575468_chromosome_1	-	-	-	-	-	-	-	-	NCTC7364_RS04040	NCTC7364_RS07570	-	-	-	-	-	-	-	NCTC7364_RS04665	-	-	-	-	-	-	-	-	-	-	-	-	-	-
102	Pluralibacter_gergoviae_ATCC_33028__NBRC_105706_NZ_BCZS01000104	-	-	-	-	-	-	-	-	-	-	-	-	-	-	-	-	ENGE1_RS03085	ENGE1_RS00275	ENGE1_RS12410	ENGE1_RS11500	-	ENGE1_RS11495	-	-	ENGE1_RS22950	-	-	-	-	-	ENGE1_RS17415	-
103	Pragia_fontium_DSM_5563__ATCC_49100_NZ_FOLW01000021	-	-	-	-	-	-	-	-	-	-	-	-	-	-	-	-	BMZ28_RS06455	BMZ28_RS09330	-	-	-	-	-	-	-	-	-	-	-	-	-	-
104	Proteus_hauseri_ATCC_700826_NZ_LXEV01000056	-	-	-	-	-	-	-	-	-	-	-	-	-	-	-	-	-	M997_RS12765	-	-	-	-	-	-	-	-	-	-	-	-	-	-
105	Proteus_mirabilis_ATCC_29906_NZ_GG668576	-	-	-	-	-	-	-	-	-	-	-	-	-	-	-	-	-	HMPREF0693_RS04340	-	-	-	-	-	-	-	-	-	-	-	-	-	-
106	Providencia_alcalifaciens_DSM_30120_NZ_ABXW01000001	-	-	-	-	-	-	-	-	-	-	-	-	-	-	-	-	-	PROVALCAL_RS15490	-	-	-	-	-	-	-	-	-	-	-	-	-	-
107	Providencia_burhodogranariea_DSM_19968_NZ_KB233229	-	-	-	-	-	-	-	-	-	-	-	-	-	-	-	-	-	OOA_RS03280	-	-	-	-	-	-	-	-	-	-	-	-	-	-
108	Providencia_heimbachae_ATCC_35613_NZ_LXEW01000074	-	-	-	-	-	-	-	-	-	-	-	-	-	-	-	-	-	M998_RS18010	-	-	-	-	-	-	-	-	-	-	-	-	-	-
109	Providencia_rustigianii_DSM_4541_NZ_GG703817	-	-	-	-	-	-	-	-	-	-	-	-	-	-	-	-	-	PROVRUST_RS14175	-	-	-	-	-	-	-	-	-	-	-	-	-	-
110	Photorhabdus_asymbiotica_subsp_australis_DSM_17609_NZ_JONO01000141	-	-	-	-	-	-	-	-	-	-	-	-	-	-	-	-	-	BO26_RS13535	-	-	-	-	-	BO26_RS16450	-	-	-	-	-	-	-	-
111	Photorhabdus_luminescens_strain_PB45_5_NZ_LOIC01000105	-	-	-	-	-	-	-	-	-	-	-	-	-	-	Phpb_RS23060	-	-	Phpb_RS10840	-	-	-	-	-	Phpb_RS00785	-	-	-	-	-	-	-	-
112	Photorhabdus_luminescens_subsp_laumondii_TTO1_NC_005126	-	-	-	-	-	-	-	-	-	-	-	-	-	PLU_RS10475	PLU_RS10475	-	-	PLU_RS15755	-	-	-	-	-	PLU_RS14925	-	-	-	-	-	-	-	-
113	Photorhabdus_luminescens_subsp_luminescens_strain_DSM_3368_NZ_JXSK01000015	-	-	-	-	-	-	-	-	-	-	-	-	TI10_RS03415	TI10_RS03415	TI10_RS03415	-	-	TI10_RS15565	-	-	-	-	-	TI10_RS17565	-	-	-	-	-	-	-	-
114	Photorhabdus_temperata_subsp_thracensis_strain_DSM_15199_NZ_CP011104	-	-	-	-	-	-	-	-	-	-	-	-	-	-	VY86_RS17280	-	-	VY86_RS00365	-	-	-	-	-	VY86_RS16680	-	-	-	-	-	-	-	-
115	Raoultella_ornithinolytica_NBRC_105727__ATCC_31898_NZ_BCYR01000035	-	-	-	-	-	-	-	ROR01S_RS17380	-	-	-	-	-	-	-	-	ROR01S_RS06795	ROR01S_RS02970	ROR01S_RS17055	-	-	-	-	-	-	-	ROR01S_RS10430	-	-	-	ROR01S_RS22240	-
116	Raoultella_planticola_ATCC_33531_NZ_JMPP01000083	-	-	-	-	-	-	-	GRPL_RS02910	-	-	-	-	-	-	-	-	GRPL_RS18195	GRPL_RS14325	GRPL_RS19730	-	-	-	-	-	-	-	GRPL_RS22740	-	-	-	GRPL_RS21430	-
117	Rouxiella_chamberiensis_strain_130333_NZ_JRWU01000102	-	NI27_RS09820	NI27_RS09820	-	-	NI27_RS01845	-	-	-	-	-	-	-	-	-	-	NI27_RS12650	NI27_RS07895	NI27_RS04595	NI27_RS16155	-	-	-	-	-	-	-	-	-	-	-	-
118	Salmonella_bongori_NCTC_12419_NC_015761	-	-	-	-	-	-	-	-	-	-	-	-	-	-	-	-	SBG_RS14855	SBG_RS11005	-	SBG_RS13070	-	-	-	-	-	-	SBG_RS19585	-	-	-	-	-
119	Serratia_ficaria_NBRC_102596_NZ_BCTS01000091	-	-	-	-	-	-	-	-	SFI01_RS08390	-	-	-	-	-	-	-	SFI01_RS11490	SFI01_RS06800	-	-	-	-	-	-	-	-	SFI01_RS12430	-	-	-	-	-
120	Serratia_fonticola_strain_DSM_4576_NZ_CP011254	-	-	-	-	-	-	-	-	WN53_RS13975	-	-	-	-	-	-	-	WN53_RS04605	WN53_RS25875	-	-	-	-	-	-	-	-	-	-	-	-	WN53_RS08090	-
121	Serratia_grimesii_NBRC_13537_NZ_BCTT01000040	-	-	-	-	-	-	-	-	SGR01S_RS05125	-	-	-	-	-	-	-	SGR01S_RS14870	SGR01S_RS16565	-	-	-	-	-	-	-	-	SGR01S_RS04155	-	-	-	-	-
122	Serratia_marcescens_strain_CDC_813_60_NZ_KN050643	-	-	-	-	-	-	-	-	DP21_RS22260	-	-	-	-	-	-	-	DP21_RS05860	DP21_RS10275	-	-	-	-	-	-	-	-	-	-	-	-	-	-
123	Serratia_nematodiphila_DZ0503SBS1_strain_DSM_21420_NZ_JPUX01000002	-	-	-	-	-	-	-	-	JL05_RS23640	-	-	-	-	-	-	-	JL05_RS07205	JL05_RS11655	-	JL05_RS03690	-	JL05_RS03685	-	-	-	-	-	-	-	-	-	-
124	Serratia_odorifera_DSM_4582_NZ_GG753567	-	-	-	-	-	-	-	HMPREF0758_RS06425	HMPREF0758_RS01210	-	-	-	-	-	-	-	HMPREF0758_RS08955	HMPREF0758_RS13070	-	-	-	-	-	-	-	-	HMPREF0758_RS02670	HMPREF0758_RS13970	-	-	-	-
125	Serratia_plymuthica_NBRC_102599_NZ_BCTU01000078	-	-	-	-	-	-	-	-	SPL01S_RS05870	-	-	-	-	-	-	-	SPL01S_RS15035	SPL01S_RS16280	-	SPL01S_RS18750	-	-	-	-	-	-	SPL01S_RS01210	-	-	-	-	-
126	Serratia_rubidaea_NBRC_103169_NZ_BCZJ01000029	-	-	-	-	-	-	-	SR2_RS19380	-	-	-	-	-	-	-	-	SR2_RS16720	SR2_RS08385	-	SR2_RS12310	-	-	-	-	-	-	SR2_RS13415	-	-	-	-	-
127	Shimwellia_blattae_DSM_4481__NBRC_105725_NC_017910	-	-	-	-	-	-	-	-	-	-	-	-	-	-	-	-	EBL_RS02190	EBL_RS02300	-	-	-	-	-	-	-	-	-	-	-	-	-	-
128	Siccibacter_turicensis_LMG_23730_NZ_AWFZ01000075	-	-	-	-	-	-	-	-	-	-	-	-	-	-	-	-	DW58_RS03550	DW58_RS10860	DW58_RS19080	DW58_RS05135	-	-	-	-	-	-	-	-	-	-	DW58_RS18465	-
129	Tatumella_ptyseos_ATCC_33301_NZ_ATMJ01000085	-	DW48_RS0114845	-	-	-	-	-	DW48_RS0115925	-	-	-	-	-	-	-	-	DW48_RS0117440	DW48_RS0101310	-	-	-	-	-	-	-	-	-	-	-	-	-	-
130	Tatumella_saanichensis_strain_NML_06_3099_NZ_ATMI01000056	-	-	-	-	-	-	-	-	-	-	-	-	-	-	-	-	DW47_RS0101185	DW47_RS0115970	-	-	-	-	-	-	-	-	-	-	-	-	-	-
131	Trabulsiella_guamensis_ATCC_49490_NZ_JMTB01000278	-	-	-	-	-	-	-	-	-	-	-	-	-	-	-	-	GTGU_RS09285	GTGU_RS10905	-	-	-	-	-	-	-	-	-	-	-	-	-	-
132	Xenorhabdus_eapokensis_strain_DL20_NZ_MKGQ01000099	-	-	-	-	-	-	-	-	-	-	-	-	-	-	-	-	-	Xedl_RS06745	-	-	-	-	-	Xedl_RS12585	-	-	-	-	-	-	-	-
133	Xenorhabdus_szentirmaii_DSM_16338_NZ_CBXF010000164	-	-	-	-	-	-	-	-	-	-	-	-	-	-	-	XSR1_RS08940	-	XSR1_RS07770	-	-	-	-	-	XSR1_RS00065	-	XSR1_RS00545	-	-	-	-	-	-
134	Xenorhabdus_thuongxuanensis_strain_30TX1_NZ_MKGR01000099	-	-	-	-	-	-	-	-	-	-	-	-	Xentx_RS03780	-	-	Xentx_RS08480	-	Xentx_RS01820	-	-	-	-	-	Xentx_RS03530	-	-	-	-	-	-	-	-
135	Yersinia_aldovae_ATCC_35236_NZ_ACCB01000001	-	-	-	-	-	-	-	-	-	YALDO0001_RS06285	-	-	-	-	-	-	YALDO0001_RS06920	YALDO0001_RS10685	-	-	-	-	-	-	-	-	-	-	-	-	-	-
136	Yersinia_aleksiciae_strain_159_NZ_CP011975	-	-	-	-	-	-	-	-	-	ACZ76_RS01245	-	-	-	-	-	-	ACZ76_RS06450	ACZ76_RS02620	-	-	-	-	-	-	-	-	-	-	-	-	-	-
137	Yersinia_bercovieri_ATCC_43970_NZ_AALC02000001	-	-	-	-	-	-	-	-	-	YBERC0001_RS04270	-	-	-	-	-	-	YBERC0001_RS04570	YBERC0001_RS05390	-	-	-	-	-	-	-	-	-	-	-	-	-	-
138	Yersinia_enterocolitica_strain_ATCC_9610_NZ_KN150735	-	-	-	-	-	-	-	-	-	DJ59_RS15095	-	-	-	-	-	-	DJ59_RS02810	DJ59_RS09430	-	-	-	-	-	-	-	-	-	-	-	-	-	-
139	Yersinia_entomophaga_strain_MH96_NZ_CP010029	-	-	-	-	-	-	-	-	-	PL78_RS17470	-	-	-	-	-	-	PL78_RS10355	PL78_RS16565	-	-	-	-	-	-	-	-	-	-	-	-	PL78_RS17295	-
140	Yersinia_frederiksenii_ATCC_33641_NZ_KN150732	-	-	-	-	-	-	-	-	-	DJ58_RS00975	-	-	-	-	-	-	DJ58_RS11490	DJ58_RS16385	-	-	-	-	-	-	-	-	-	-	-	-	-	-
141	Yersinia_intermedia_ATCC_29909_NZ_AALF02000001	-	-	-	-	-	-	-	-	-	YINTE0001_RS01240	-	-	-	-	-	-	YINTE0001_RS07210	YINTE0001_RS00955	-	-	-	-	-	-	-	-	YINTE0001_RS16470	-	-	-	-	-
142	Yersinia_kristensenii_ATCC_33638_NZ_ACCA01000001	-	-	-	-	-	-	-	-	-	YKRIS0001_RS05255	-	-	-	-	-	-	YKRIS0001_RS05715	YKRIS0001_RS07205	-	-	-	-	-	-	-	-	-	-	-	-	-	-
143	Yersinia_massiliensis_CCUG_53443_NZ_HE997664	-	-	-	-	-	-	-	-	-	BN68_RS06740	-	-	-	-	-	-	BN68_RS17500	BN68_RS08200	-	-	-	-	-	-	-	-	-	-	-	-	-	-
144	Yersinia_mollaretii_ATCC_43969_NZ_AALD02000001	-	-	-	-	-	-	-	-	-	YMOLL0001_RS16585	-	-	-	-	-	-	-	YMOLL0001_RS08810	-	-	-	-	-	-	-	-	-	-	-	-	-	-
145	Yersinia_nurmii_strain_type_strain_CIP110231_NZ_CPYD01000045	-	-	-	-	-	-	-	-	-	AD970_RS04700	-	-	-	-	-	-	AD970_RS08260	AD970_RS03810	-	-	-	-	-	-	-	-	-	-	-	-	-	-
146	Yersinia_pekkanenii_strain_type_strain_CIP110230_NZ_CWJL01000250	-	-	-	-	-	-	-	-	-	ALC31_RS05425	-	-	-	-	-	-	-	ALC31_RS11625	-	-	-	-	-	-	-	-	-	-	-	-	-	-
147	Yersinia_pseudotuberculosis_NBRC_105692_NZ_BAUR01000001	-	-	-	-	-	-	-	-	-	YP1_RS17510	-	-	-	-	-	-	-	YP1_RS09885	-	-	-	-	-	-	-	-	-	-	-	-	YP1_RS09125	-
148	Yersinia_rohdei_ATCC_43380_NZ_ACCD01000001	-	-	-	-	-	-	-	-	-	YROHD0001_RS06235	-	-	-	-	-	-	YROHD0001_RS08085	YROHD0001_RS08270	-	-	-	-	-	-	-	-	-	-	-	-	YROHD0001_RS00870	-
149	Yersinia_ruckeri_ATCC_29473_NZ_KN150748	-	-	-	-	-	-	-	-	-	-	-	-	-	-	-	-	-	DJ39_RS14265	-	-	-	-	-	-	-	-	-	-	-	-	-	-
150	Yokenella_regensburgei_ATCC_49455_NZ_JMPS01000105	-	-	-	-	-	-	-	-	GYRE_RS01250	-	-	-	-	-	-	-	GYRE_RS13480	GYRE_RS14690	-	-	-	-	-	-	-	-	GYRE_RS18605	-	-	-	-	-

## Sheet: Binary_phytase
Species	Phytase					Total genes
	Phytase_G1	Phytase_G2	Phytase_G3	Phytase_G4	Phytase_G5
Edwardsiella_ictaluri_ATCC_33202_NZ_AFJI01000117	1	0	0	1	1	3
Edwardsiella_tarda_ATCC_15947__NBRC_105688_NZ_BANW01000001	1	0	0	1	1	3
Edwardsiella_tarda_strain_ET883_NZ_JRGQ01000167	1	0	0	1	1	3
Edwardsiella_hoshinae_NBRC_105699__ATCC_33379_NZ_BAUC01000001	0	0	0	1	1	2
Cronobacter_malonaticus_LMG_23826_NZ_CP013940	0	0	1	1	0	2
Cronobacter_sakazakii_strain_ATCC_29544_NZ_CP011047	0	0	1	1	0	2
Cronobacter_universalis_NCTC_9529_NZ_CP012257	0	0	1	1	0	2
Buttiauxella_ferragutiae_ATCC_51602_NZ_LXEQ01000089	0	0	1	1	0	2
Buttiauxella_brennerae_ATCC_51605_NZ_LXER01000088	0	0	1	1	0	2
Escherichia_coli_DSM_30083__JCM_1649__ATCC_11775_NZ_KK583188	0	0	1	1	0	2
Buttiauxella_gaviniae_ATCC_51604_NZ_LXEP01000133	0	0	1	1	0	2
Buttiauxella_noackiae_ATCC_51607_NZ_LXEO01000104	0	0	1	1	0	2
Plesiomonas_shigelloides_strain_NCTC10360_NZ_LT575468_chromosome_1	0	0	1	1	0	2
Hafnia_paralvei_ATCC_29927_NZ_LXET01000086	1	0	0	1	0	2
Hafnia_alvei_ATCC_13337_NZ_JMPK01000161	1	0	0	1	0	2
Enterobacter_mori_LMG_25706_NZ_AEXB01000139	0	1	1	0	0	2
Pectobacterium_atrosepticum_strain_NCPPB_549_NZ_JQHK01000060	0	1	1	0	0	2
Pectobacterium_parmentieri_strain_RNS08_42_1A_NZ_JMDL01000026	0	1	1	0	0	2
Mangrovibacter_phragmitis_strain_MP23_NZ_LYRP01000050	0	1	1	0	0	2
Dickeya_chrysanthemi_NCPPB_402_NZ_AOOA01000077	0	1	1	0	0	2
Dickeya_dadantii_NCPPB_898_NZ_AOOE01000052	0	1	1	0	0	2
Dickeya_dianthicola_NCPPB_453_NZ_AOOB01000052	0	1	1	0	0	2
Dickeya_solani_IPO_2222_NZ_CP015137	0	1	1	0	0	2
Dickeya_zeae_NCPPB_2538_NZ_AOOF01000046	0	1	1	0	0	2
Pectobacterium_carotovorum_subsp_brasiliense_strain_LMG_21371_NZ_JQOE01000109	0	1	1	0	0	2
Serratia_odorifera_DSM_4582_NZ_GG753567	0	1	1	0	0	2
Dickeya_paradisiaca_NCPPB_2511_NZ_CM001857	0	1	1	0	0	2
Pectobacterium_carotovorum_subsp_carotovorum_strain_NCPPB_312_NZ_JQHJ01000055	0	1	1	0	0	2
Pantoea_agglomerans_NBRC_102470_NZ_BCZA01000025	0	1	1	0	0	2
Pectobacterium_betavasculorum_strain_NCPPB_2795_NZ_JQHM01000093	0	1	1	0	0	2
Pectobacterium_wasabiae_CFBP_3304_NZ_CP015750	0	1	1	0	0	2
Escherichia_fergusonii_ATCC_35469_strain_ATCC_35469T_NC_011740	0	0	0	1	0	1
Escherichia_albertii_TW07627_NZ_CH991859	0	0	0	1	0	1
Yersinia_entomophaga_strain_MH96_NZ_CP010029	0	0	0	1	0	1
Yersinia_pseudotuberculosis_NBRC_105692_NZ_BAUR01000001	0	0	0	1	0	1
Yersinia_rohdei_ATCC_43380_NZ_ACCD01000001	0	0	0	1	0	1
Budvicia_aquatica_DSM_5075__ATCC_35567_NZ_ATYS01000110	0	0	0	1	0	1
Yersinia_intermedia_ATCC_29909_NZ_AALF02000001	0	0	0	1	0	1
Kosakonia_sacchari_SP1_CP007215	0	0	0	1	0	1
Yersinia_enterocolitica_subsp_palearctica_Y11_NC_017564	0	0	0	1	0	1
Yersinia_similis_strain_228_NZ_CP007230	0	0	0	1	0	1
Yersinia_aldovae_ATCC_35236_NZ_ACCB01000001	0	0	0	1	0	1
Yersinia_aleksiciae_strain_159_NZ_CP011975	0	0	0	1	0	1
Yersinia_bercovieri_ATCC_43970_NZ_AALC02000001	0	0	0	1	0	1
Yersinia_enterocolitica_strain_ATCC_9610_NZ_KN150735	0	0	0	1	0	1
Yersinia_frederiksenii_ATCC_33641_NZ_KN150732	0	0	0	1	0	1
Yersinia_kristensenii_ATCC_33638_NZ_ACCA01000001	0	0	0	1	0	1
Yersinia_massiliensis_CCUG_53443_NZ_HE997664	0	0	0	1	0	1
Yersinia_mollaretii_ATCC_43969_NZ_AALD02000001	0	0	0	1	0	1
Yersinia_nurmii_strain_type_strain_CIP110231_NZ_CPYD01000045	0	0	0	1	0	1
Yersinia_pekkanenii_strain_type_strain_CIP110230_NZ_CWJL01000250	0	0	0	1	0	1
Enterobacter_ludwigii_strain_EN_119_NZ_CP017279	0	0	1	0	0	1
Cronobacter_dublinensis_subsp_dublinensis_LMG_23823_NZ_CP012266	0	0	1	0	0	1
Enterobacter_cloacae_subsp_cloacae_ATCC_13047_NC_014121	0	0	1	0	0	1
Cronobacter_condimenti_1330_NZ_CAKW01000001	0	0	1	0	0	1
Cronobacter_dublinensis_subsp_lactaridi_LMG_23825_NZ_AJKX01000095	0	0	1	0	0	1
Cronobacter_dublinensis_subsp_lausannensis_LMG_23824_NZ_AJKY01000105	0	0	1	0	0	1
Cronobacter_muytjensii_ATCC_51329_NZ_CP012268	0	0	1	0	0	1
Enterobacter_hormaechei_subsp_oharae_strain_DSM_16687_NZ_CP017180	0	0	1	0	0	1
Enterobacter_hormaechei_subsp_steigerwaltii_strain_DSM_16691_NZ_CP017179	0	0	1	0	0	1
Franconibacter_helveticus_LMG_23732_NZ_AWFX01000057	0	0	1	0	0	1
Franconibacter_pulveris_DSM_19144_NZ_JHYZ01000036	0	0	1	0	0	1
Enterobacter_hormaechei_ATCC_49162_NZ_MKEQ01000003	0	0	1	0	0	1
Serratia_plymuthica_NBRC_102599_NZ_BCTU01000078	0	0	1	0	0	1
Pectobacterium_carotovorum_subsp_odoriferum_strain_NCPPB_3839_NZ_JQOG01000156	0	0	1	0	0	1
Enterobacter_asburiae_strain_ATCC_35953_NZ_CP011863	0	0	1	0	0	1
Leminorella_grimontii_ATCC_33999__DSM_5078_NZ_JMPN01000057	0	0	1	0	0	1
Serratia_nematodiphila_DZ0503SBS1_strain_DSM_21420_NZ_JPUX01000002	0	0	1	0	0	1
Buttiauxella_agrestis_ATCC_33320_NZ_JMPI01000093	0	0	1	0	0	1
Serratia_fonticola_strain_DSM_4576_NZ_CP011254	0	0	1	0	0	1
Cedecea_davisae_DSM_4568_NZ_KE161033	0	0	1	0	0	1
Serratia_liquefaciens_ATCC_27592_NC_021741	0	0	1	0	0	1
Serratia_ficaria_NBRC_102596_NZ_BCTS01000091	0	0	1	0	0	1
Serratia_grimesii_NBRC_13537_NZ_BCTT01000040	0	0	1	0	0	1
Yokenella_regensburgei_ATCC_49455_NZ_JMPS01000105	0	0	1	0	0	1
Serratia_marcescens_strain_CDC_813_60_NZ_KN050643	0	0	1	0	0	1
Klebsiella_quasipneumoniae_subsp_quasipneumoniae_strain_01A030_NZ_CCDF01000065	0	1	0	0	0	1
Klebsiella_oxytoca_NBRC_105695_NZ_BCZK01000043	0	1	0	0	0	1
Klebsiella_pneumoniae_strain_ATCC_13883_NZ_KN046822	0	1	0	0	0	1
Klebsiella_quasipneumoniae_subsp_similipneumoniae_strain_07A044_NZ_CBZR010000046	0	1	0	0	0	1
Klebsiella_variicola_strain_DSM_15968_NZ_CP010523	0	1	0	0	0	1
Klebsiella_aerogenes_KCTC_2190_NC_015663	0	1	0	0	0	1
Pantoea_ananatis_LMG_2665_NZ_JFZU01000028	0	1	0	0	0	1
Raoultella_ornithinolytica_NBRC_105727__ATCC_31898_NZ_BCYR01000035	0	1	0	0	0	1
Raoultella_planticola_ATCC_33531_NZ_JMPP01000083	0	1	0	0	0	1
Serratia_rubidaea_NBRC_103169_NZ_BCZJ01000029	0	1	0	0	0	1
Erwinia_iniecta_strain_B120_NZ_JRXE01000092	0	1	0	0	0	1
Erwinia_persicina_NBRC_102418_NZ_BCTN01000066	0	1	0	0	0	1
Pantoea_stewartii_subsp_indologenes_strain_LMG_2632_NZ_JPKO01000034	0	1	0	0	0	1
Lonsdalea_quercina_strain_ATCC_29281_NZ_FNQS01000022	0	1	0	0	0	1
Tatumella_ptyseos_ATCC_33301_NZ_ATMJ01000085	0	1	0	0	0	1
Kluyvera_ascorbata_ATCC_33433_NZ_JMPL01000253	0	0	0	0	0	0
Klebsiella_pneumoniae_subsp_rhinoscleromatis_ATCC_13884_NZ_GG703522	0	0	0	0	0	0
Pluralibacter_gergoviae_ATCC_33028__NBRC_105706_NZ_BCZS01000104	0	0	0	0	0	0
Enterobacter_soli_ATCC_BAA_2102_NZ_LXES01000074	0	0	0	0	0	0
Kluyvera_georgiana_ATCC_51603_NZ_LXEU01000163	0	0	0	0	0	0
Klebsiella_pneumoniae_subsp_ozaenae_NBRC_105683_NZ_BCZL01000154	0	0	0	0	0	0
Citrobacter_sedlakii_NBRC_105722_NZ_BBNB01000001	0	0	0	0	0	0
Kluyvera_cryocrescens_NBRC_102467_NZ_BCTM01000101	0	0	0	0	0	0
Kluyvera_intermedia_NBRC_102594__ATCC_33110_NZ_BCYS01000109	0	0	0	0	0	0
Xenorhabdus_nematophila_ATCC_19061_NC_014228	0	0	0	0	0	0
Photorhabdus_luminescens_subsp_luminescens_strain_DSM_3368_NZ_JXSK01000015	0	0	0	0	0	0
Enterobacter_kobei_strain_JCM_8580_MKXD00000000	0	0	0	0	0	0
Leclercia_adecarboxylata_ATCC_23216__NBRC_102595_NZ_BCNP01000071	0	0	0	0	0	0
Siccibacter_turicensis_LMG_23730_NZ_AWFZ01000075	0	0	0	0	0	0
Salmonella_enterica_subsp_enterica_serovar_Typhimurium_str_LT2_NC_003197	0	0	0	0	0	0
Citrobacter_freundii_NBRC_12681_NZ_BBMV01000001	0	0	0	0	0	0
Xenorhabdus_szentirmaii_DSM_16338_NZ_CBXF010000164	0	0	0	0	0	0
Xenorhabdus_thuongxuanensis_strain_30TX1_NZ_MKGR01000099	0	0	0	0	0	0
Photorhabdus_luminescens_subsp_laumondii_TTO1_NC_005126	0	0	0	0	0	0
Citrobacter_rodentium_NBRC_105723_NZ_BBNA01000001	0	0	0	0	0	0
Citrobacter_werkmanii_NBRC_105721_NZ_BBMW01000001	0	0	0	0	0	0
Kosakonia_oryzae_strain_Ola_51_NZ_CP014007	0	0	0	0	0	0
Sodalis_praecaptivus_strain_HS1_NZ_CP006569	0	0	0	0	0	0
Moellerella_wisconsensis_ATCC_35017_NZ_LGAA01000108	0	0	0	0	0	0
Rahnella_aquatilis_CIP_78_65__ATCC_33071_NC_016818	0	0	0	0	0	0
Escherichia_vulneris_NBRC_102420_NZ_BBMZ01000001	0	0	0	0	0	0
Salmonella_bongori_NCTC_12419_NC_015761	0	0	0	0	0	0
Photorhabdus_luminescens_strain_PB45_5_NZ_LOIC01000105	0	0	0	0	0	0
Photorhabdus_temperata_subsp_thracensis_strain_DSM_15199_NZ_CP011104	0	0	0	0	0	0
Citrobacter_pasteurii_strain_CIP_55_13_NZ_CDHL01000056	0	0	0	0	0	0
Rouxiella_chamberiensis_strain_130333_NZ_JRWU01000102	0	0	0	0	0	0
Lelliottia_amnigena_NBRC_105700_NZ_BCNN01000020	0	0	0	0	0	0
Erwinia_oleae_strain_DAPP_PG531_NZ_JNVB01000099	0	0	0	0	0	0
Xenorhabdus_doucetiae_strain_FRM16_NZ_FO704550	0	0	0	0	0	0
Photorhabdus_asymbiotica_subsp_australis_DSM_17609_NZ_JONO01000141	0	0	0	0	0	0
Xenorhabdus_eapokensis_strain_DL20_NZ_MKGQ01000099	0	0	0	0	0	0
Arsenophonus_nasoniae_DSM_15247_NZ_AUCC01000302	0	0	0	0	0	0
Erwinia_pyrifoliae_DSM_12163_NC_017390	0	0	0	0	0	0
Erwinia_tasmaniensis_Et1_99_NC_010694	0	0	0	0	0	0
Providencia_sneebia_DSM_19967_NZ_CM001773	0	0	0	0	0	0
Tatumella_morbirosei_strain_LMG_23360_NZ_JPKR02000005	0	0	0	0	0	0
Atlantibacter_hermannii_NBRC_105704_BAFF00000000	0	0	0	0	0	0
Cedecea_neteri_NBRC_105707__ATCC_33855_NZ_BCTL01000139	0	0	0	0	0	0
Cosenzaea_myxofaciens_ATCC_19692_NZ_LXEN01000293	0	0	0	0	0	0
Erwinia_amylovora_NBRC_12687_NZ_BAYW01000001	0	0	0	0	0	0
Erwinia_piriflorinigrans_CFBP_5888_NZ_CAHS01000025	0	0	0	0	0	0
Ewingella_americana_ATCC_33852_NZ_JMPJ01000092	0	0	0	0	0	0
Morganella_morganii_subsp_morganii_NBRC_3848_NZ_BCZU01000025	0	0	0	0	0	0
Pragia_fontium_DSM_5563__ATCC_49100_NZ_FOLW01000021	0	0	0	0	0	0
Proteus_hauseri_ATCC_700826_NZ_LXEV01000056	0	0	0	0	0	0
Proteus_mirabilis_ATCC_29906_NZ_GG668576	0	0	0	0	0	0
Providencia_alcalifaciens_DSM_30120_NZ_ABXW01000001	0	0	0	0	0	0
Providencia_burhodogranariea_DSM_19968_NZ_KB233229	0	0	0	0	0	0
Providencia_heimbachae_ATCC_35613_NZ_LXEW01000074	0	0	0	0	0	0
Providencia_rustigianii_DSM_4541_NZ_GG703817	0	0	0	0	0	0
Shimwellia_blattae_DSM_4481__NBRC_105725_NC_017910	0	0	0	0	0	0
Tatumella_saanichensis_strain_NML_06_3099_NZ_ATMI01000056	0	0	0	0	0	0
Trabulsiella_guamensis_ATCC_49490_NZ_JMTB01000278	0	0	0	0	0	0
Yersinia_ruckeri_ATCC_29473_NZ_KN150748	0	0	0	0	0	0

## Sheet: binary_Tannase
Species	Tannase						Total genes
	Tannese_G1	Tannese_G2	Tannese_G3	Tannese_G4	Tannese_G5	Tannese_G6
Rouxiella_chamberiensis_strain_130333_NZ_JRWU01000102	0	1	1	0	0	1	3
Lonsdalea_quercina_strain_ATCC_29281_NZ_FNQS01000022	0	1	1	0	0	0	2
Rahnella_aquatilis_CIP_78_65__ATCC_33071_NC_016818	1	0	0	0	0	0	1
Dickeya_dianthicola_NCPPB_453_NZ_AOOB01000052	0	0	0	1	0	0	1
Franconibacter_helveticus_LMG_23732_NZ_AWFX01000057	0	0	0	0	1	0	1
Klebsiella_quasipneumoniae_subsp_quasipneumoniae_strain_01A030_NZ_CCDF01000065	0	1	0	0	0	0	1
Klebsiella_quasipneumoniae_subsp_similipneumoniae_strain_07A044_NZ_CBZR010000046	0	1	0	0	0	0	1
Klebsiella_variicola_strain_DSM_15968_NZ_CP010523	0	1	0	0	0	0	1
Tatumella_ptyseos_ATCC_33301_NZ_ATMJ01000085	0	1	0	0	0	0	1
Cronobacter_dublinensis_subsp_dublinensis_LMG_23823_NZ_CP012266	0	0	0	0	0	0	0
Cronobacter_malonaticus_LMG_23826_NZ_CP013940	0	0	0	0	0	0	0
Cronobacter_sakazakii_strain_ATCC_29544_NZ_CP011047	0	0	0	0	0	0	0
Cronobacter_universalis_NCTC_9529_NZ_CP012257	0	0	0	0	0	0	0
Enterobacter_asburiae_strain_ATCC_35953_NZ_CP011863	0	0	0	0	0	0	0
Enterobacter_cloacae_subsp_cloacae_ATCC_13047_NC_014121	0	0	0	0	0	0	0
Enterobacter_hormaechei_ATCC_49162_NZ_MKEQ01000003	0	0	0	0	0	0	0
Enterobacter_kobei_strain_JCM_8580_MKXD00000000	0	0	0	0	0	0	0
Enterobacter_ludwigii_strain_EN_119_NZ_CP017279	0	0	0	0	0	0	0
Erwinia_pyrifoliae_DSM_12163_NC_017390	0	0	0	0	0	0	0
Erwinia_tasmaniensis_Et1_99_NC_010694	0	0	0	0	0	0	0
Escherichia_coli_DSM_30083__JCM_1649__ATCC_11775_NZ_KK583188	0	0	0	0	0	0	0
Escherichia_fergusonii_ATCC_35469_strain_ATCC_35469T_NC_011740	0	0	0	0	0	0	0
Pantoea_stewartii_subsp_indologenes_strain_LMG_2632_NZ_JPKO01000034	0	0	0	0	0	0	0
Providencia_sneebia_DSM_19967_NZ_CM001773	0	0	0	0	0	0	0
Salmonella_enterica_subsp_enterica_serovar_Typhimurium_str_LT2_NC_003197	0	0	0	0	0	0	0
Serratia_liquefaciens_ATCC_27592_NC_021741	0	0	0	0	0	0	0
Sodalis_praecaptivus_strain_HS1_NZ_CP006569	0	0	0	0	0	0	0
Tatumella_morbirosei_strain_LMG_23360_NZ_JPKR02000005	0	0	0	0	0	0	0
Xenorhabdus_doucetiae_strain_FRM16_NZ_FO704550	0	0	0	0	0	0	0
Xenorhabdus_nematophila_ATCC_19061_NC_014228	0	0	0	0	0	0	0
Yersinia_enterocolitica_subsp_palearctica_Y11_NC_017564	0	0	0	0	0	0	0
Yersinia_similis_strain_228_NZ_CP007230	0	0	0	0	0	0	0
Arsenophonus_nasoniae_DSM_15247_NZ_AUCC01000302	0	0	0	0	0	0	0
Atlantibacter_hermannii_NBRC_105704_BAFF00000000	0	0	0	0	0	0	0
Budvicia_aquatica_DSM_5075__ATCC_35567_NZ_ATYS01000110	0	0	0	0	0	0	0
Buttiauxella_agrestis_ATCC_33320_NZ_JMPI01000093	0	0	0	0	0	0	0
Buttiauxella_brennerae_ATCC_51605_NZ_LXER01000088	0	0	0	0	0	0	0
Buttiauxella_ferragutiae_ATCC_51602_NZ_LXEQ01000089	0	0	0	0	0	0	0
Buttiauxella_gaviniae_ATCC_51604_NZ_LXEP01000133	0	0	0	0	0	0	0
Buttiauxella_noackiae_ATCC_51607_NZ_LXEO01000104	0	0	0	0	0	0	0
Cedecea_davisae_DSM_4568_NZ_KE161033	0	0	0	0	0	0	0
Cedecea_neteri_NBRC_105707__ATCC_33855_NZ_BCTL01000139	0	0	0	0	0	0	0
Citrobacter_freundii_NBRC_12681_NZ_BBMV01000001	0	0	0	0	0	0	0
Citrobacter_pasteurii_strain_CIP_55_13_NZ_CDHL01000056	0	0	0	0	0	0	0
Citrobacter_rodentium_NBRC_105723_NZ_BBNA01000001	0	0	0	0	0	0	0
Citrobacter_sedlakii_NBRC_105722_NZ_BBNB01000001	0	0	0	0	0	0	0
Citrobacter_werkmanii_NBRC_105721_NZ_BBMW01000001	0	0	0	0	0	0	0
Cosenzaea_myxofaciens_ATCC_19692_NZ_LXEN01000293	0	0	0	0	0	0	0
Cronobacter_condimenti_1330_NZ_CAKW01000001	0	0	0	0	0	0	0
Cronobacter_dublinensis_subsp_lactaridi_LMG_23825_NZ_AJKX01000095	0	0	0	0	0	0	0
Cronobacter_dublinensis_subsp_lausannensis_LMG_23824_NZ_AJKY01000105	0	0	0	0	0	0	0
Cronobacter_muytjensii_ATCC_51329_NZ_CP012268	0	0	0	0	0	0	0
Dickeya_chrysanthemi_NCPPB_402_NZ_AOOA01000077	0	0	0	0	0	0	0
Dickeya_dadantii_NCPPB_898_NZ_AOOE01000052	0	0	0	0	0	0	0
Dickeya_paradisiaca_NCPPB_2511_NZ_CM001857	0	0	0	0	0	0	0
Dickeya_solani_IPO_2222_NZ_CP015137	0	0	0	0	0	0	0
Dickeya_zeae_NCPPB_2538_NZ_AOOF01000046	0	0	0	0	0	0	0
Edwardsiella_hoshinae_NBRC_105699__ATCC_33379_NZ_BAUC01000001	0	0	0	0	0	0	0
Edwardsiella_ictaluri_ATCC_33202_NZ_AFJI01000117	0	0	0	0	0	0	0
Edwardsiella_tarda_ATCC_15947__NBRC_105688_NZ_BANW01000001	0	0	0	0	0	0	0
Edwardsiella_tarda_strain_ET883_NZ_JRGQ01000167	0	0	0	0	0	0	0
Enterobacter_hormaechei_subsp_oharae_strain_DSM_16687_NZ_CP017180	0	0	0	0	0	0	0
Enterobacter_hormaechei_subsp_steigerwaltii_strain_DSM_16691_NZ_CP017179	0	0	0	0	0	0	0
Enterobacter_mori_LMG_25706_NZ_AEXB01000139	0	0	0	0	0	0	0
Enterobacter_soli_ATCC_BAA_2102_NZ_LXES01000074	0	0	0	0	0	0	0
Erwinia_amylovora_NBRC_12687_NZ_BAYW01000001	0	0	0	0	0	0	0
Erwinia_iniecta_strain_B120_NZ_JRXE01000092	0	0	0	0	0	0	0
Erwinia_oleae_strain_DAPP_PG531_NZ_JNVB01000099	0	0	0	0	0	0	0
Erwinia_persicina_NBRC_102418_NZ_BCTN01000066	0	0	0	0	0	0	0
Erwinia_piriflorinigrans_CFBP_5888_NZ_CAHS01000025	0	0	0	0	0	0	0
Escherichia_albertii_TW07627_NZ_CH991859	0	0	0	0	0	0	0
Escherichia_vulneris_NBRC_102420_NZ_BBMZ01000001	0	0	0	0	0	0	0
Ewingella_americana_ATCC_33852_NZ_JMPJ01000092	0	0	0	0	0	0	0
Franconibacter_pulveris_DSM_19144_NZ_JHYZ01000036	0	0	0	0	0	0	0
Hafnia_alvei_ATCC_13337_NZ_JMPK01000161	0	0	0	0	0	0	0
Hafnia_paralvei_ATCC_29927_NZ_LXET01000086	0	0	0	0	0	0	0
Klebsiella_aerogenes_KCTC_2190_NC_015663	0	0	0	0	0	0	0
Klebsiella_oxytoca_NBRC_105695_NZ_BCZK01000043	0	0	0	0	0	0	0
Klebsiella_pneumoniae_strain_ATCC_13883_NZ_KN046822	0	0	0	0	0	0	0
Klebsiella_pneumoniae_subsp_ozaenae_NBRC_105683_NZ_BCZL01000154	0	0	0	0	0	0	0
Klebsiella_pneumoniae_subsp_rhinoscleromatis_ATCC_13884_NZ_GG703522	0	0	0	0	0	0	0
Kluyvera_ascorbata_ATCC_33433_NZ_JMPL01000253	0	0	0	0	0	0	0
Kluyvera_cryocrescens_NBRC_102467_NZ_BCTM01000101	0	0	0	0	0	0	0
Kluyvera_georgiana_ATCC_51603_NZ_LXEU01000163	0	0	0	0	0	0	0
Kluyvera_intermedia_NBRC_102594__ATCC_33110_NZ_BCYS01000109	0	0	0	0	0	0	0
Kosakonia_oryzae_strain_Ola_51_NZ_CP014007	0	0	0	0	0	0	0
Kosakonia_sacchari_SP1_CP007215	0	0	0	0	0	0	0
Leclercia_adecarboxylata_ATCC_23216__NBRC_102595_NZ_BCNP01000071	0	0	0	0	0	0	0
Lelliottia_amnigena_NBRC_105700_NZ_BCNN01000020	0	0	0	0	0	0	0
Leminorella_grimontii_ATCC_33999__DSM_5078_NZ_JMPN01000057	0	0	0	0	0	0	0
Mangrovibacter_phragmitis_strain_MP23_NZ_LYRP01000050	0	0	0	0	0	0	0
Moellerella_wisconsensis_ATCC_35017_NZ_LGAA01000108	0	0	0	0	0	0	0
Morganella_morganii_subsp_morganii_NBRC_3848_NZ_BCZU01000025	0	0	0	0	0	0	0
Pantoea_agglomerans_NBRC_102470_NZ_BCZA01000025	0	0	0	0	0	0	0
Pantoea_ananatis_LMG_2665_NZ_JFZU01000028	0	0	0	0	0	0	0
Pectobacterium_atrosepticum_strain_NCPPB_549_NZ_JQHK01000060	0	0	0	0	0	0	0
Pectobacterium_betavasculorum_strain_NCPPB_2795_NZ_JQHM01000093	0	0	0	0	0	0	0
Pectobacterium_carotovorum_subsp_brasiliense_strain_LMG_21371_NZ_JQOE01000109	0	0	0	0	0	0	0
Pectobacterium_carotovorum_subsp_carotovorum_strain_NCPPB_312_NZ_JQHJ01000055	0	0	0	0	0	0	0
Pectobacterium_carotovorum_subsp_odoriferum_strain_NCPPB_3839_NZ_JQOG01000156	0	0	0	0	0	0	0
Pectobacterium_parmentieri_strain_RNS08_42_1A_NZ_JMDL01000026	0	0	0	0	0	0	0
Pectobacterium_wasabiae_CFBP_3304_NZ_CP015750	0	0	0	0	0	0	0
Plesiomonas_shigelloides_strain_NCTC10360_NZ_LT575468_chromosome_1	0	0	0	0	0	0	0
Pluralibacter_gergoviae_ATCC_33028__NBRC_105706_NZ_BCZS01000104	0	0	0	0	0	0	0
Pragia_fontium_DSM_5563__ATCC_49100_NZ_FOLW01000021	0	0	0	0	0	0	0
Proteus_hauseri_ATCC_700826_NZ_LXEV01000056	0	0	0	0	0	0	0
Proteus_mirabilis_ATCC_29906_NZ_GG668576	0	0	0	0	0	0	0
Providencia_alcalifaciens_DSM_30120_NZ_ABXW01000001	0	0	0	0	0	0	0
Providencia_burhodogranariea_DSM_19968_NZ_KB233229	0	0	0	0	0	0	0
Providencia_heimbachae_ATCC_35613_NZ_LXEW01000074	0	0	0	0	0	0	0
Providencia_rustigianii_DSM_4541_NZ_GG703817	0	0	0	0	0	0	0
Photorhabdus_asymbiotica_subsp_australis_DSM_17609_NZ_JONO01000141	0	0	0	0	0	0	0
Photorhabdus_luminescens_strain_PB45_5_NZ_LOIC01000105	0	0	0	0	0	0	0
Photorhabdus_luminescens_subsp_laumondii_TTO1_NC_005126	0	0	0	0	0	0	0
Photorhabdus_luminescens_subsp_luminescens_strain_DSM_3368_NZ_JXSK01000015	0	0	0	0	0	0	0
Photorhabdus_temperata_subsp_thracensis_strain_DSM_15199_NZ_CP011104	0	0	0	0	0	0	0
Raoultella_ornithinolytica_NBRC_105727__ATCC_31898_NZ_BCYR01000035	0	0	0	0	0	0	0
Raoultella_planticola_ATCC_33531_NZ_JMPP01000083	0	0	0	0	0	0	0
Salmonella_bongori_NCTC_12419_NC_015761	0	0	0	0	0	0	0
Serratia_ficaria_NBRC_102596_NZ_BCTS01000091	0	0	0	0	0	0	0
Serratia_fonticola_strain_DSM_4576_NZ_CP011254	0	0	0	0	0	0	0
Serratia_grimesii_NBRC_13537_NZ_BCTT01000040	0	0	0	0	0	0	0
Serratia_marcescens_strain_CDC_813_60_NZ_KN050643	0	0	0	0	0	0	0
Serratia_nematodiphila_DZ0503SBS1_strain_DSM_21420_NZ_JPUX01000002	0	0	0	0	0	0	0
Serratia_odorifera_DSM_4582_NZ_GG753567	0	0	0	0	0	0	0
Serratia_plymuthica_NBRC_102599_NZ_BCTU01000078	0	0	0	0	0	0	0
Serratia_rubidaea_NBRC_103169_NZ_BCZJ01000029	0	0	0	0	0	0	0
Shimwellia_blattae_DSM_4481__NBRC_105725_NC_017910	0	0	0	0	0	0	0
Siccibacter_turicensis_LMG_23730_NZ_AWFZ01000075	0	0	0	0	0	0	0
Tatumella_saanichensis_strain_NML_06_3099_NZ_ATMI01000056	0	0	0	0	0	0	0
Trabulsiella_guamensis_ATCC_49490_NZ_JMTB01000278	0	0	0	0	0	0	0
Xenorhabdus_eapokensis_strain_DL20_NZ_MKGQ01000099	0	0	0	0	0	0	0
Xenorhabdus_szentirmaii_DSM_16338_NZ_CBXF010000164	0	0	0	0	0	0	0
Xenorhabdus_thuongxuanensis_strain_30TX1_NZ_MKGR01000099	0	0	0	0	0	0	0
Yersinia_aldovae_ATCC_35236_NZ_ACCB01000001	0	0	0	0	0	0	0
Yersinia_aleksiciae_strain_159_NZ_CP011975	0	0	0	0	0	0	0
Yersinia_bercovieri_ATCC_43970_NZ_AALC02000001	0	0	0	0	0	0	0
Yersinia_enterocolitica_strain_ATCC_9610_NZ_KN150735	0	0	0	0	0	0	0
Yersinia_entomophaga_strain_MH96_NZ_CP010029	0	0	0	0	0	0	0
Yersinia_frederiksenii_ATCC_33641_NZ_KN150732	0	0	0	0	0	0	0
Yersinia_intermedia_ATCC_29909_NZ_AALF02000001	0	0	0	0	0	0	0
Yersinia_kristensenii_ATCC_33638_NZ_ACCA01000001	0	0	0	0	0	0	0
Yersinia_massiliensis_CCUG_53443_NZ_HE997664	0	0	0	0	0	0	0
Yersinia_mollaretii_ATCC_43969_NZ_AALD02000001	0	0	0	0	0	0	0
Yersinia_nurmii_strain_type_strain_CIP110231_NZ_CPYD01000045	0	0	0	0	0	0	0
Yersinia_pekkanenii_strain_type_strain_CIP110230_NZ_CWJL01000250	0	0	0	0	0	0	0
Yersinia_pseudotuberculosis_NBRC_105692_NZ_BAUR01000001	0	0	0	0	0	0	0
Yersinia_rohdei_ATCC_43380_NZ_ACCD01000001	0	0	0	0	0	0	0
Yersinia_ruckeri_ATCC_29473_NZ_KN150748	0	0	0	0	0	0	0
Yokenella_regensburgei_ATCC_49455_NZ_JMPS01000105	0	0	0	0	0	0	0

## Sheet: binary_lectin
Species	Lectin					Total genes
	Lectin_G1	Lectin_G2	Lectin_G3	Lectin_G4	Lectin_G5
Photorhabdus_luminescens_subsp_luminescens_strain_DSM_3368_NZ_JXSK01000015	0	1	1	1	0	3
Xenorhabdus_nematophila_ATCC_19061_NC_014228	0	0	0	1	1	2
Xenorhabdus_thuongxuanensis_strain_30TX1_NZ_MKGR01000099	0	1	0	0	1	2
Photorhabdus_luminescens_subsp_laumondii_TTO1_NC_005126	0	0	1	1	0	2
Enterobacter_ludwigii_strain_EN_119_NZ_CP017279	1	0	1	0	0	2
Xenorhabdus_szentirmaii_DSM_16338_NZ_CBXF010000164	0	0	0	0	1	1
Photorhabdus_luminescens_strain_PB45_5_NZ_LOIC01000105	0	0	0	1	0	1
Photorhabdus_temperata_subsp_thracensis_strain_DSM_15199_NZ_CP011104	0	0	0	1	0	1
Klebsiella_quasipneumoniae_subsp_quasipneumoniae_strain_01A030_NZ_CCDF01000065	0	0	0	0	0	0
Cronobacter_malonaticus_LMG_23826_NZ_CP013940	0	0	0	0	0	0
Cronobacter_sakazakii_strain_ATCC_29544_NZ_CP011047	0	0	0	0	0	0
Klebsiella_oxytoca_NBRC_105695_NZ_BCZK01000043	0	0	0	0	0	0
Klebsiella_pneumoniae_strain_ATCC_13883_NZ_KN046822	0	0	0	0	0	0
Klebsiella_quasipneumoniae_subsp_similipneumoniae_strain_07A044_NZ_CBZR010000046	0	0	0	0	0	0
Klebsiella_variicola_strain_DSM_15968_NZ_CP010523	0	0	0	0	0	0
Cronobacter_universalis_NCTC_9529_NZ_CP012257	0	0	0	0	0	0
Enterobacter_mori_LMG_25706_NZ_AEXB01000139	0	0	0	0	0	0
Kluyvera_ascorbata_ATCC_33433_NZ_JMPL01000253	0	0	0	0	0	0
Edwardsiella_ictaluri_ATCC_33202_NZ_AFJI01000117	0	0	0	0	0	0
Edwardsiella_tarda_ATCC_15947__NBRC_105688_NZ_BANW01000001	0	0	0	0	0	0
Klebsiella_pneumoniae_subsp_rhinoscleromatis_ATCC_13884_NZ_GG703522	0	0	0	0	0	0
Pluralibacter_gergoviae_ATCC_33028__NBRC_105706_NZ_BCZS01000104	0	0	0	0	0	0
Enterobacter_soli_ATCC_BAA_2102_NZ_LXES01000074	0	0	0	0	0	0
Cronobacter_dublinensis_subsp_dublinensis_LMG_23823_NZ_CP012266	0	0	0	0	0	0
Enterobacter_cloacae_subsp_cloacae_ATCC_13047_NC_014121	0	0	0	0	0	0
Cronobacter_condimenti_1330_NZ_CAKW01000001	0	0	0	0	0	0
Cronobacter_dublinensis_subsp_lactaridi_LMG_23825_NZ_AJKX01000095	0	0	0	0	0	0
Cronobacter_dublinensis_subsp_lausannensis_LMG_23824_NZ_AJKY01000105	0	0	0	0	0	0
Cronobacter_muytjensii_ATCC_51329_NZ_CP012268	0	0	0	0	0	0
Enterobacter_hormaechei_subsp_oharae_strain_DSM_16687_NZ_CP017180	0	0	0	0	0	0
Enterobacter_hormaechei_subsp_steigerwaltii_strain_DSM_16691_NZ_CP017179	0	0	0	0	0	0
Franconibacter_helveticus_LMG_23732_NZ_AWFX01000057	0	0	0	0	0	0
Franconibacter_pulveris_DSM_19144_NZ_JHYZ01000036	0	0	0	0	0	0
Pectobacterium_atrosepticum_strain_NCPPB_549_NZ_JQHK01000060	0	0	0	0	0	0
Pectobacterium_parmentieri_strain_RNS08_42_1A_NZ_JMDL01000026	0	0	0	0	0	0
Buttiauxella_ferragutiae_ATCC_51602_NZ_LXEQ01000089	0	0	0	0	0	0
Kluyvera_georgiana_ATCC_51603_NZ_LXEU01000163	0	0	0	0	0	0
Klebsiella_aerogenes_KCTC_2190_NC_015663	0	0	0	0	0	0
Pantoea_ananatis_LMG_2665_NZ_JFZU01000028	0	0	0	0	0	0
Mangrovibacter_phragmitis_strain_MP23_NZ_LYRP01000050	0	0	0	0	0	0
Edwardsiella_hoshinae_NBRC_105699__ATCC_33379_NZ_BAUC01000001	0	0	0	0	0	0
Edwardsiella_tarda_strain_ET883_NZ_JRGQ01000167	0	0	0	0	0	0
Klebsiella_pneumoniae_subsp_ozaenae_NBRC_105683_NZ_BCZL01000154	0	0	0	0	0	0
Raoultella_ornithinolytica_NBRC_105727__ATCC_31898_NZ_BCYR01000035	0	0	0	0	0	0
Raoultella_planticola_ATCC_33531_NZ_JMPP01000083	0	0	0	0	0	0
Dickeya_chrysanthemi_NCPPB_402_NZ_AOOA01000077	0	0	0	0	0	0
Dickeya_dadantii_NCPPB_898_NZ_AOOE01000052	0	0	0	0	0	0
Dickeya_dianthicola_NCPPB_453_NZ_AOOB01000052	0	0	0	0	0	0
Dickeya_solani_IPO_2222_NZ_CP015137	0	0	0	0	0	0
Dickeya_zeae_NCPPB_2538_NZ_AOOF01000046	0	0	0	0	0	0
Pectobacterium_carotovorum_subsp_brasiliense_strain_LMG_21371_NZ_JQOE01000109	0	0	0	0	0	0
Serratia_odorifera_DSM_4582_NZ_GG753567	0	0	0	0	0	0
Citrobacter_sedlakii_NBRC_105722_NZ_BBNB01000001	0	0	0	0	0	0
Kluyvera_cryocrescens_NBRC_102467_NZ_BCTM01000101	0	0	0	0	0	0
Kluyvera_intermedia_NBRC_102594__ATCC_33110_NZ_BCYS01000109	0	0	0	0	0	0
Buttiauxella_brennerae_ATCC_51605_NZ_LXER01000088	0	0	0	0	0	0
Enterobacter_hormaechei_ATCC_49162_NZ_MKEQ01000003	0	0	0	0	0	0
Enterobacter_kobei_strain_JCM_8580_MKXD00000000	0	0	0	0	0	0
Leclercia_adecarboxylata_ATCC_23216__NBRC_102595_NZ_BCNP01000071	0	0	0	0	0	0
Siccibacter_turicensis_LMG_23730_NZ_AWFZ01000075	0	0	0	0	0	0
Dickeya_paradisiaca_NCPPB_2511_NZ_CM001857	0	0	0	0	0	0
Pectobacterium_carotovorum_subsp_carotovorum_strain_NCPPB_312_NZ_JQHJ01000055	0	0	0	0	0	0
Salmonella_enterica_subsp_enterica_serovar_Typhimurium_str_LT2_NC_003197	0	0	0	0	0	0
Citrobacter_freundii_NBRC_12681_NZ_BBMV01000001	0	0	0	0	0	0
Serratia_plymuthica_NBRC_102599_NZ_BCTU01000078	0	0	0	0	0	0
Serratia_rubidaea_NBRC_103169_NZ_BCZJ01000029	0	0	0	0	0	0
Pectobacterium_carotovorum_subsp_odoriferum_strain_NCPPB_3839_NZ_JQOG01000156	0	0	0	0	0	0
Erwinia_iniecta_strain_B120_NZ_JRXE01000092	0	0	0	0	0	0
Erwinia_persicina_NBRC_102418_NZ_BCTN01000066	0	0	0	0	0	0
Escherichia_coli_DSM_30083__JCM_1649__ATCC_11775_NZ_KK583188	0	0	0	0	0	0
Citrobacter_rodentium_NBRC_105723_NZ_BBNA01000001	0	0	0	0	0	0
Citrobacter_werkmanii_NBRC_105721_NZ_BBMW01000001	0	0	0	0	0	0
Kosakonia_oryzae_strain_Ola_51_NZ_CP014007	0	0	0	0	0	0
Escherichia_fergusonii_ATCC_35469_strain_ATCC_35469T_NC_011740	0	0	0	0	0	0
Escherichia_albertii_TW07627_NZ_CH991859	0	0	0	0	0	0
Enterobacter_asburiae_strain_ATCC_35953_NZ_CP011863	0	0	0	0	0	0
Leminorella_grimontii_ATCC_33999__DSM_5078_NZ_JMPN01000057	0	0	0	0	0	0
Serratia_nematodiphila_DZ0503SBS1_strain_DSM_21420_NZ_JPUX01000002	0	0	0	0	0	0
Pantoea_stewartii_subsp_indologenes_strain_LMG_2632_NZ_JPKO01000034	0	0	0	0	0	0
Hafnia_paralvei_ATCC_29927_NZ_LXET01000086	0	0	0	0	0	0
Pantoea_agglomerans_NBRC_102470_NZ_BCZA01000025	0	0	0	0	0	0
Pectobacterium_betavasculorum_strain_NCPPB_2795_NZ_JQHM01000093	0	0	0	0	0	0
Pectobacterium_wasabiae_CFBP_3304_NZ_CP015750	0	0	0	0	0	0
Sodalis_praecaptivus_strain_HS1_NZ_CP006569	0	0	0	0	0	0
Moellerella_wisconsensis_ATCC_35017_NZ_LGAA01000108	0	0	0	0	0	0
Rahnella_aquatilis_CIP_78_65__ATCC_33071_NC_016818	0	0	0	0	0	0
Escherichia_vulneris_NBRC_102420_NZ_BBMZ01000001	0	0	0	0	0	0
Yersinia_entomophaga_strain_MH96_NZ_CP010029	0	0	0	0	0	0
Yersinia_pseudotuberculosis_NBRC_105692_NZ_BAUR01000001	0	0	0	0	0	0
Yersinia_rohdei_ATCC_43380_NZ_ACCD01000001	0	0	0	0	0	0
Buttiauxella_agrestis_ATCC_33320_NZ_JMPI01000093	0	0	0	0	0	0
Serratia_fonticola_strain_DSM_4576_NZ_CP011254	0	0	0	0	0	0
Cedecea_davisae_DSM_4568_NZ_KE161033	0	0	0	0	0	0
Salmonella_bongori_NCTC_12419_NC_015761	0	0	0	0	0	0
Budvicia_aquatica_DSM_5075__ATCC_35567_NZ_ATYS01000110	0	0	0	0	0	0
Yersinia_intermedia_ATCC_29909_NZ_AALF02000001	0	0	0	0	0	0
Serratia_liquefaciens_ATCC_27592_NC_021741	0	0	0	0	0	0
Serratia_ficaria_NBRC_102596_NZ_BCTS01000091	0	0	0	0	0	0
Serratia_grimesii_NBRC_13537_NZ_BCTT01000040	0	0	0	0	0	0
Yokenella_regensburgei_ATCC_49455_NZ_JMPS01000105	0	0	0	0	0	0
Citrobacter_pasteurii_strain_CIP_55_13_NZ_CDHL01000056	0	0	0	0	0	0
Rouxiella_chamberiensis_strain_130333_NZ_JRWU01000102	0	0	0	0	0	0
Kosakonia_sacchari_SP1_CP007215	0	0	0	0	0	0
Buttiauxella_gaviniae_ATCC_51604_NZ_LXEP01000133	0	0	0	0	0	0
Buttiauxella_noackiae_ATCC_51607_NZ_LXEO01000104	0	0	0	0	0	0
Plesiomonas_shigelloides_strain_NCTC10360_NZ_LT575468_chromosome_1	0	0	0	0	0	0
Hafnia_alvei_ATCC_13337_NZ_JMPK01000161	0	0	0	0	0	0
Lelliottia_amnigena_NBRC_105700_NZ_BCNN01000020	0	0	0	0	0	0
Erwinia_oleae_strain_DAPP_PG531_NZ_JNVB01000099	0	0	0	0	0	0
Xenorhabdus_doucetiae_strain_FRM16_NZ_FO704550	0	0	0	0	0	0
Photorhabdus_asymbiotica_subsp_australis_DSM_17609_NZ_JONO01000141	0	0	0	0	0	0
Xenorhabdus_eapokensis_strain_DL20_NZ_MKGQ01000099	0	0	0	0	0	0
Arsenophonus_nasoniae_DSM_15247_NZ_AUCC01000302	0	0	0	0	0	0
Yersinia_enterocolitica_subsp_palearctica_Y11_NC_017564	0	0	0	0	0	0
Yersinia_similis_strain_228_NZ_CP007230	0	0	0	0	0	0
Yersinia_aldovae_ATCC_35236_NZ_ACCB01000001	0	0	0	0	0	0
Yersinia_aleksiciae_strain_159_NZ_CP011975	0	0	0	0	0	0
Yersinia_bercovieri_ATCC_43970_NZ_AALC02000001	0	0	0	0	0	0
Yersinia_enterocolitica_strain_ATCC_9610_NZ_KN150735	0	0	0	0	0	0
Yersinia_frederiksenii_ATCC_33641_NZ_KN150732	0	0	0	0	0	0
Yersinia_kristensenii_ATCC_33638_NZ_ACCA01000001	0	0	0	0	0	0
Yersinia_massiliensis_CCUG_53443_NZ_HE997664	0	0	0	0	0	0
Yersinia_mollaretii_ATCC_43969_NZ_AALD02000001	0	0	0	0	0	0
Yersinia_nurmii_strain_type_strain_CIP110231_NZ_CPYD01000045	0	0	0	0	0	0
Yersinia_pekkanenii_strain_type_strain_CIP110230_NZ_CWJL01000250	0	0	0	0	0	0
Serratia_marcescens_strain_CDC_813_60_NZ_KN050643	0	0	0	0	0	0
Lonsdalea_quercina_strain_ATCC_29281_NZ_FNQS01000022	0	0	0	0	0	0
Tatumella_ptyseos_ATCC_33301_NZ_ATMJ01000085	0	0	0	0	0	0
Erwinia_pyrifoliae_DSM_12163_NC_017390	0	0	0	0	0	0
Erwinia_tasmaniensis_Et1_99_NC_010694	0	0	0	0	0	0
Providencia_sneebia_DSM_19967_NZ_CM001773	0	0	0	0	0	0
Tatumella_morbirosei_strain_LMG_23360_NZ_JPKR02000005	0	0	0	0	0	0
Atlantibacter_hermannii_NBRC_105704_BAFF00000000	0	0	0	0	0	0
Cedecea_neteri_NBRC_105707__ATCC_33855_NZ_BCTL01000139	0	0	0	0	0	0
Cosenzaea_myxofaciens_ATCC_19692_NZ_LXEN01000293	0	0	0	0	0	0
Erwinia_amylovora_NBRC_12687_NZ_BAYW01000001	0	0	0	0	0	0
Erwinia_piriflorinigrans_CFBP_5888_NZ_CAHS01000025	0	0	0	0	0	0
Ewingella_americana_ATCC_33852_NZ_JMPJ01000092	0	0	0	0	0	0
Morganella_morganii_subsp_morganii_NBRC_3848_NZ_BCZU01000025	0	0	0	0	0	0
Pragia_fontium_DSM_5563__ATCC_49100_NZ_FOLW01000021	0	0	0	0	0	0
Proteus_hauseri_ATCC_700826_NZ_LXEV01000056	0	0	0	0	0	0
Proteus_mirabilis_ATCC_29906_NZ_GG668576	0	0	0	0	0	0
Providencia_alcalifaciens_DSM_30120_NZ_ABXW01000001	0	0	0	0	0	0
Providencia_burhodogranariea_DSM_19968_NZ_KB233229	0	0	0	0	0	0
Providencia_heimbachae_ATCC_35613_NZ_LXEW01000074	0	0	0	0	0	0
Providencia_rustigianii_DSM_4541_NZ_GG703817	0	0	0	0	0	0
Shimwellia_blattae_DSM_4481__NBRC_105725_NC_017910	0	0	0	0	0	0
Tatumella_saanichensis_strain_NML_06_3099_NZ_ATMI01000056	0	0	0	0	0	0
Trabulsiella_guamensis_ATCC_49490_NZ_JMTB01000278	0	0	0	0	0	0
Yersinia_ruckeri_ATCC_29473_NZ_KN150748	0	0	0	0	0	0

## Sheet: binary_phenolic
Species	Phenolic related metabolic genes							Total genes
	Phenolic_G0	Phenolic_G1	Phenolic_G2	Phenolic_G3	Phenolic_G4	Phenolic_G5	Phenolic_G6
Enterobacter_soli_ATCC_BAA_2102_NZ_LXES01000074	1	1	1	1	1	1	0	6
Kluyvera_ascorbata_ATCC_33433_NZ_JMPL01000253	1	1	1	1	0	1	1	6
Cronobacter_dublinensis_subsp_dublinensis_LMG_23823_NZ_CP012266	1	1	1	1	0	1	0	5
Cronobacter_malonaticus_LMG_23826_NZ_CP013940	1	1	1	1	0	1	0	5
Cronobacter_sakazakii_strain_ATCC_29544_NZ_CP011047	1	1	1	1	0	1	0	5
Cronobacter_universalis_NCTC_9529_NZ_CP012257	1	1	1	1	0	1	0	5
Enterobacter_cloacae_subsp_cloacae_ATCC_13047_NC_014121	1	1	1	1	0	1	0	5
Enterobacter_hormaechei_ATCC_49162_NZ_MKEQ01000003	1	1	1	1	0	1	0	5
Enterobacter_ludwigii_strain_EN_119_NZ_CP017279	1	1	1	1	0	1	0	5
Citrobacter_sedlakii_NBRC_105722_NZ_BBNB01000001	1	1	1	1	0	1	0	5
Citrobacter_werkmanii_NBRC_105721_NZ_BBMW01000001	1	1	1	1	0	1	0	5
Cronobacter_condimenti_1330_NZ_CAKW01000001	1	1	1	1	0	1	0	5
Cronobacter_dublinensis_subsp_lactaridi_LMG_23825_NZ_AJKX01000095	1	1	1	1	0	1	0	5
Cronobacter_dublinensis_subsp_lausannensis_LMG_23824_NZ_AJKY01000105	1	1	1	1	0	1	0	5
Cronobacter_muytjensii_ATCC_51329_NZ_CP012268	1	1	1	1	0	1	0	5
Enterobacter_hormaechei_subsp_oharae_strain_DSM_16687_NZ_CP017180	1	1	1	1	0	1	0	5
Enterobacter_hormaechei_subsp_steigerwaltii_strain_DSM_16691_NZ_CP017179	1	1	1	1	0	1	0	5
Enterobacter_mori_LMG_25706_NZ_AEXB01000139	1	1	1	1	0	1	0	5
Franconibacter_helveticus_LMG_23732_NZ_AWFX01000057	1	1	1	1	0	1	0	5
Franconibacter_pulveris_DSM_19144_NZ_JHYZ01000036	1	1	1	1	0	1	0	5
Klebsiella_aerogenes_KCTC_2190_NC_015663	1	1	1	1	0	1	0	5
Klebsiella_oxytoca_NBRC_105695_NZ_BCZK01000043	1	1	1	1	0	1	0	5
Klebsiella_pneumoniae_strain_ATCC_13883_NZ_KN046822	1	1	1	1	0	1	0	5
Klebsiella_quasipneumoniae_subsp_quasipneumoniae_strain_01A030_NZ_CCDF01000065	1	1	1	1	0	1	0	5
Klebsiella_quasipneumoniae_subsp_similipneumoniae_strain_07A044_NZ_CBZR010000046	1	1	1	1	0	1	0	5
Klebsiella_variicola_strain_DSM_15968_NZ_CP010523	1	1	1	1	0	1	0	5
Kluyvera_cryocrescens_NBRC_102467_NZ_BCTM01000101	1	1	1	1	0	1	0	5
Kluyvera_georgiana_ATCC_51603_NZ_LXEU01000163	1	1	1	1	0	1	0	5
Kluyvera_intermedia_NBRC_102594__ATCC_33110_NZ_BCYS01000109	1	1	1	1	0	1	0	5
Kosakonia_oryzae_strain_Ola_51_NZ_CP014007	1	1	1	1	0	1	0	5
Pantoea_ananatis_LMG_2665_NZ_JFZU01000028	1	1	1	1	0	1	0	5
Pluralibacter_gergoviae_ATCC_33028__NBRC_105706_NZ_BCZS01000104	1	1	1	1	0	1	0	5
Enterobacter_asburiae_strain_ATCC_35953_NZ_CP011863	1	1	0	1	0	1	0	4
Escherichia_fergusonii_ATCC_35469_strain_ATCC_35469T_NC_011740	1	1	0	1	0	1	0	4
Pantoea_stewartii_subsp_indologenes_strain_LMG_2632_NZ_JPKO01000034	1	1	1	0	0	1	0	4
Salmonella_enterica_subsp_enterica_serovar_Typhimurium_str_LT2_NC_003197	1	1	0	1	0	1	0	4
Citrobacter_freundii_NBRC_12681_NZ_BBMV01000001	1	1	0	1	0	1	0	4
Citrobacter_pasteurii_strain_CIP_55_13_NZ_CDHL01000056	1	1	0	1	0	1	0	4
Citrobacter_rodentium_NBRC_105723_NZ_BBNA01000001	0	1	1	1	0	1	0	4
Escherichia_albertii_TW07627_NZ_CH991859	1	1	0	1	0	1	0	4
Klebsiella_pneumoniae_subsp_ozaenae_NBRC_105683_NZ_BCZL01000154	1	1	0	1	0	1	0	4
Klebsiella_pneumoniae_subsp_rhinoscleromatis_ATCC_13884_NZ_GG703522	0	1	1	1	0	1	0	4
Leclercia_adecarboxylata_ATCC_23216__NBRC_102595_NZ_BCNP01000071	1	1	0	0	1	1	0	4
Leminorella_grimontii_ATCC_33999__DSM_5078_NZ_JMPN01000057	1	1	0	1	0	1	0	4
Mangrovibacter_phragmitis_strain_MP23_NZ_LYRP01000050	1	1	1	1	0	0	0	4
Pectobacterium_atrosepticum_strain_NCPPB_549_NZ_JQHK01000060	1	1	1	1	0	0	0	4
Pectobacterium_parmentieri_strain_RNS08_42_1A_NZ_JMDL01000026	1	1	1	1	0	0	0	4
Rouxiella_chamberiensis_strain_130333_NZ_JRWU01000102	1	1	1	1	0	0	0	4
Serratia_nematodiphila_DZ0503SBS1_strain_DSM_21420_NZ_JPUX01000002	1	1	0	1	0	1	0	4
Siccibacter_turicensis_LMG_23730_NZ_AWFZ01000075	1	1	1	1	0	0	0	4
Enterobacter_kobei_strain_JCM_8580_MKXD00000000	1	1	1	0	0	0	0	3
Rahnella_aquatilis_CIP_78_65__ATCC_33071_NC_016818	1	1	1	0	0	0	0	3
Buttiauxella_brennerae_ATCC_51605_NZ_LXER01000088	1	1	1	0	0	0	0	3
Dickeya_chrysanthemi_NCPPB_402_NZ_AOOA01000077	1	1	1	0	0	0	0	3
Dickeya_dadantii_NCPPB_898_NZ_AOOE01000052	1	1	1	0	0	0	0	3
Dickeya_dianthicola_NCPPB_453_NZ_AOOB01000052	1	1	1	0	0	0	0	3
Dickeya_solani_IPO_2222_NZ_CP015137	1	1	1	0	0	0	0	3
Dickeya_zeae_NCPPB_2538_NZ_AOOF01000046	1	1	1	0	0	0	0	3
Erwinia_iniecta_strain_B120_NZ_JRXE01000092	1	1	1	0	0	0	0	3
Erwinia_persicina_NBRC_102418_NZ_BCTN01000066	1	1	1	0	0	0	0	3
Escherichia_vulneris_NBRC_102420_NZ_BBMZ01000001	1	1	1	0	0	0	0	3
Hafnia_paralvei_ATCC_29927_NZ_LXET01000086	1	1	1	0	0	0	0	3
Kosakonia_sacchari_SP1_CP007215	1	1	1	0	0	0	0	3
Pantoea_agglomerans_NBRC_102470_NZ_BCZA01000025	1	1	1	0	0	0	0	3
Pectobacterium_betavasculorum_strain_NCPPB_2795_NZ_JQHM01000093	1	1	1	0	0	0	0	3
Pectobacterium_carotovorum_subsp_brasiliense_strain_LMG_21371_NZ_JQOE01000109	1	1	1	0	0	0	0	3
Pectobacterium_carotovorum_subsp_odoriferum_strain_NCPPB_3839_NZ_JQOG01000156	1	1	1	0	0	0	0	3
Pectobacterium_wasabiae_CFBP_3304_NZ_CP015750	1	1	1	0	0	0	0	3
Raoultella_ornithinolytica_NBRC_105727__ATCC_31898_NZ_BCYR01000035	1	1	1	0	0	0	0	3
Raoultella_planticola_ATCC_33531_NZ_JMPP01000083	1	1	1	0	0	0	0	3
Salmonella_bongori_NCTC_12419_NC_015761	1	1	0	1	0	0	0	3
Serratia_plymuthica_NBRC_102599_NZ_BCTU01000078	1	1	0	1	0	0	0	3
Serratia_rubidaea_NBRC_103169_NZ_BCZJ01000029	1	1	0	1	0	0	0	3
Erwinia_tasmaniensis_Et1_99_NC_010694	1	1	0	0	0	0	0	2
Escherichia_coli_DSM_30083__JCM_1649__ATCC_11775_NZ_KK583188	1	1	0	0	0	0	0	2
Serratia_liquefaciens_ATCC_27592_NC_021741	1	1	0	0	0	0	0	2
Sodalis_praecaptivus_strain_HS1_NZ_CP006569	1	1	0	0	0	0	0	2
Tatumella_morbirosei_strain_LMG_23360_NZ_JPKR02000005	1	1	0	0	0	0	0	2
Yersinia_enterocolitica_subsp_palearctica_Y11_NC_017564	1	1	0	0	0	0	0	2
Arsenophonus_nasoniae_DSM_15247_NZ_AUCC01000302	0	1	1	0	0	0	0	2
Atlantibacter_hermannii_NBRC_105704_BAFF00000000	1	1	0	0	0	0	0	2
Budvicia_aquatica_DSM_5075__ATCC_35567_NZ_ATYS01000110	1	1	0	0	0	0	0	2
Buttiauxella_agrestis_ATCC_33320_NZ_JMPI01000093	1	1	0	0	0	0	0	2
Buttiauxella_ferragutiae_ATCC_51602_NZ_LXEQ01000089	1	1	0	0	0	0	0	2
Buttiauxella_gaviniae_ATCC_51604_NZ_LXEP01000133	1	1	0	0	0	0	0	2
Buttiauxella_noackiae_ATCC_51607_NZ_LXEO01000104	1	1	0	0	0	0	0	2
Cedecea_davisae_DSM_4568_NZ_KE161033	1	1	0	0	0	0	0	2
Cedecea_neteri_NBRC_105707__ATCC_33855_NZ_BCTL01000139	1	1	0	0	0	0	0	2
Dickeya_paradisiaca_NCPPB_2511_NZ_CM001857	1	1	0	0	0	0	0	2
Erwinia_oleae_strain_DAPP_PG531_NZ_JNVB01000099	1	1	0	0	0	0	0	2
Erwinia_piriflorinigrans_CFBP_5888_NZ_CAHS01000025	1	1	0	0	0	0	0	2
Ewingella_americana_ATCC_33852_NZ_JMPJ01000092	1	1	0	0	0	0	0	2
Hafnia_alvei_ATCC_13337_NZ_JMPK01000161	1	1	0	0	0	0	0	2
Lelliottia_amnigena_NBRC_105700_NZ_BCNN01000020	1	1	0	0	0	0	0	2
Lonsdalea_quercina_strain_ATCC_29281_NZ_FNQS01000022	1	1	0	0	0	0	0	2
Pectobacterium_carotovorum_subsp_carotovorum_strain_NCPPB_312_NZ_JQHJ01000055	1	1	0	0	0	0	0	2
Pragia_fontium_DSM_5563__ATCC_49100_NZ_FOLW01000021	1	1	0	0	0	0	0	2
Serratia_ficaria_NBRC_102596_NZ_BCTS01000091	1	1	0	0	0	0	0	2
Serratia_fonticola_strain_DSM_4576_NZ_CP011254	1	1	0	0	0	0	0	2
Serratia_grimesii_NBRC_13537_NZ_BCTT01000040	1	1	0	0	0	0	0	2
Serratia_marcescens_strain_CDC_813_60_NZ_KN050643	1	1	0	0	0	0	0	2
Serratia_odorifera_DSM_4582_NZ_GG753567	1	1	0	0	0	0	0	2
Shimwellia_blattae_DSM_4481__NBRC_105725_NC_017910	1	1	0	0	0	0	0	2
Tatumella_ptyseos_ATCC_33301_NZ_ATMJ01000085	1	1	0	0	0	0	0	2
Tatumella_saanichensis_strain_NML_06_3099_NZ_ATMI01000056	1	1	0	0	0	0	0	2
Trabulsiella_guamensis_ATCC_49490_NZ_JMTB01000278	1	1	0	0	0	0	0	2
Yersinia_aldovae_ATCC_35236_NZ_ACCB01000001	1	1	0	0	0	0	0	2
Yersinia_aleksiciae_strain_159_NZ_CP011975	1	1	0	0	0	0	0	2
Yersinia_bercovieri_ATCC_43970_NZ_AALC02000001	1	1	0	0	0	0	0	2
Yersinia_enterocolitica_strain_ATCC_9610_NZ_KN150735	1	1	0	0	0	0	0	2
Yersinia_entomophaga_strain_MH96_NZ_CP010029	1	1	0	0	0	0	0	2
Yersinia_frederiksenii_ATCC_33641_NZ_KN150732	1	1	0	0	0	0	0	2
Yersinia_intermedia_ATCC_29909_NZ_AALF02000001	1	1	0	0	0	0	0	2
Yersinia_kristensenii_ATCC_33638_NZ_ACCA01000001	1	1	0	0	0	0	0	2
Yersinia_massiliensis_CCUG_53443_NZ_HE997664	1	1	0	0	0	0	0	2
Yersinia_nurmii_strain_type_strain_CIP110231_NZ_CPYD01000045	1	1	0	0	0	0	0	2
Yersinia_rohdei_ATCC_43380_NZ_ACCD01000001	1	1	0	0	0	0	0	2
Yokenella_regensburgei_ATCC_49455_NZ_JMPS01000105	1	1	0	0	0	0	0	2
Erwinia_pyrifoliae_DSM_12163_NC_017390	0	1	0	0	0	0	0	1
Providencia_sneebia_DSM_19967_NZ_CM001773	0	1	0	0	0	0	0	1
Xenorhabdus_doucetiae_strain_FRM16_NZ_FO704550	0	1	0	0	0	0	0	1
Xenorhabdus_nematophila_ATCC_19061_NC_014228	0	1	0	0	0	0	0	1
Yersinia_similis_strain_228_NZ_CP007230	0	1	0	0	0	0	0	1
Cosenzaea_myxofaciens_ATCC_19692_NZ_LXEN01000293	0	1	0	0	0	0	0	1
Edwardsiella_hoshinae_NBRC_105699__ATCC_33379_NZ_BAUC01000001	0	1	0	0	0	0	0	1
Edwardsiella_ictaluri_ATCC_33202_NZ_AFJI01000117	0	1	0	0	0	0	0	1
Edwardsiella_tarda_ATCC_15947__NBRC_105688_NZ_BANW01000001	0	1	0	0	0	0	0	1
Edwardsiella_tarda_strain_ET883_NZ_JRGQ01000167	0	1	0	0	0	0	0	1
Erwinia_amylovora_NBRC_12687_NZ_BAYW01000001	0	1	0	0	0	0	0	1
Moellerella_wisconsensis_ATCC_35017_NZ_LGAA01000108	0	1	0	0	0	0	0	1
Morganella_morganii_subsp_morganii_NBRC_3848_NZ_BCZU01000025	0	1	0	0	0	0	0	1
Plesiomonas_shigelloides_strain_NCTC10360_NZ_LT575468_chromosome_1	0	1	0	0	0	0	0	1
Proteus_hauseri_ATCC_700826_NZ_LXEV01000056	0	1	0	0	0	0	0	1
Proteus_mirabilis_ATCC_29906_NZ_GG668576	0	1	0	0	0	0	0	1
Providencia_alcalifaciens_DSM_30120_NZ_ABXW01000001	0	1	0	0	0	0	0	1
Providencia_burhodogranariea_DSM_19968_NZ_KB233229	0	1	0	0	0	0	0	1
Providencia_heimbachae_ATCC_35613_NZ_LXEW01000074	0	1	0	0	0	0	0	1
Providencia_rustigianii_DSM_4541_NZ_GG703817	0	1	0	0	0	0	0	1
Photorhabdus_asymbiotica_subsp_australis_DSM_17609_NZ_JONO01000141	0	1	0	0	0	0	0	1
Photorhabdus_luminescens_strain_PB45_5_NZ_LOIC01000105	0	1	0	0	0	0	0	1
Photorhabdus_luminescens_subsp_laumondii_TTO1_NC_005126	0	1	0	0	0	0	0	1
Photorhabdus_luminescens_subsp_luminescens_strain_DSM_3368_NZ_JXSK01000015	0	1	0	0	0	0	0	1
Photorhabdus_temperata_subsp_thracensis_strain_DSM_15199_NZ_CP011104	0	1	0	0	0	0	0	1
Xenorhabdus_eapokensis_strain_DL20_NZ_MKGQ01000099	0	1	0	0	0	0	0	1
Xenorhabdus_szentirmaii_DSM_16338_NZ_CBXF010000164	0	1	0	0	0	0	0	1
Xenorhabdus_thuongxuanensis_strain_30TX1_NZ_MKGR01000099	0	1	0	0	0	0	0	1
Yersinia_mollaretii_ATCC_43969_NZ_AALD02000001	0	1	0	0	0	0	0	1
Yersinia_pekkanenii_strain_type_strain_CIP110230_NZ_CWJL01000250	0	1	0	0	0	0	0	1
Yersinia_pseudotuberculosis_NBRC_105692_NZ_BAUR01000001	0	1	0	0	0	0	0	1
Yersinia_ruckeri_ATCC_29473_NZ_KN150748	0	1	0	0	0	0	0	1

## Sheet: binary_trypsin
Species	Trypsin			Total genes
	Trypsin_G1	Trypsin_G2	Trypsin_G3
Xenorhabdus_nematophila_ATCC_19061_NC_014228	1	0	1	2
Xenorhabdus_szentirmaii_DSM_16338_NZ_CBXF010000164	1	0	1	2
Cronobacter_malonaticus_LMG_23826_NZ_CP013940	0	1	0	1
Cronobacter_sakazakii_strain_ATCC_29544_NZ_CP011047	0	1	0	1
Kluyvera_ascorbata_ATCC_33433_NZ_JMPL01000253	0	1	0	1
Pluralibacter_gergoviae_ATCC_33028__NBRC_105706_NZ_BCZS01000104	0	1	0	1
Photorhabdus_luminescens_subsp_luminescens_strain_DSM_3368_NZ_JXSK01000015	1	0	0	1
Enterobacter_kobei_strain_JCM_8580_MKXD00000000	0	1	0	1
Xenorhabdus_thuongxuanensis_strain_30TX1_NZ_MKGR01000099	1	0	0	1
Photorhabdus_luminescens_subsp_laumondii_TTO1_NC_005126	1	0	0	1
Photorhabdus_luminescens_strain_PB45_5_NZ_LOIC01000105	1	0	0	1
Photorhabdus_temperata_subsp_thracensis_strain_DSM_15199_NZ_CP011104	1	0	0	1
Xenorhabdus_doucetiae_strain_FRM16_NZ_FO704550	1	0	0	1
Photorhabdus_asymbiotica_subsp_australis_DSM_17609_NZ_JONO01000141	1	0	0	1
Xenorhabdus_eapokensis_strain_DL20_NZ_MKGQ01000099	1	0	0	1
Klebsiella_quasipneumoniae_subsp_quasipneumoniae_strain_01A030_NZ_CCDF01000065	0	0	0	0
Enterobacter_ludwigii_strain_EN_119_NZ_CP017279	0	0	0	0
Klebsiella_oxytoca_NBRC_105695_NZ_BCZK01000043	0	0	0	0
Klebsiella_pneumoniae_strain_ATCC_13883_NZ_KN046822	0	0	0	0
Klebsiella_quasipneumoniae_subsp_similipneumoniae_strain_07A044_NZ_CBZR010000046	0	0	0	0
Klebsiella_variicola_strain_DSM_15968_NZ_CP010523	0	0	0	0
Cronobacter_universalis_NCTC_9529_NZ_CP012257	0	0	0	0
Enterobacter_mori_LMG_25706_NZ_AEXB01000139	0	0	0	0
Edwardsiella_ictaluri_ATCC_33202_NZ_AFJI01000117	0	0	0	0
Edwardsiella_tarda_ATCC_15947__NBRC_105688_NZ_BANW01000001	0	0	0	0
Klebsiella_pneumoniae_subsp_rhinoscleromatis_ATCC_13884_NZ_GG703522	0	0	0	0
Enterobacter_soli_ATCC_BAA_2102_NZ_LXES01000074	0	0	0	0
Cronobacter_dublinensis_subsp_dublinensis_LMG_23823_NZ_CP012266	0	0	0	0
Enterobacter_cloacae_subsp_cloacae_ATCC_13047_NC_014121	0	0	0	0
Cronobacter_condimenti_1330_NZ_CAKW01000001	0	0	0	0
Cronobacter_dublinensis_subsp_lactaridi_LMG_23825_NZ_AJKX01000095	0	0	0	0
Cronobacter_dublinensis_subsp_lausannensis_LMG_23824_NZ_AJKY01000105	0	0	0	0
Cronobacter_muytjensii_ATCC_51329_NZ_CP012268	0	0	0	0
Enterobacter_hormaechei_subsp_oharae_strain_DSM_16687_NZ_CP017180	0	0	0	0
Enterobacter_hormaechei_subsp_steigerwaltii_strain_DSM_16691_NZ_CP017179	0	0	0	0
Franconibacter_helveticus_LMG_23732_NZ_AWFX01000057	0	0	0	0
Franconibacter_pulveris_DSM_19144_NZ_JHYZ01000036	0	0	0	0
Pectobacterium_atrosepticum_strain_NCPPB_549_NZ_JQHK01000060	0	0	0	0
Pectobacterium_parmentieri_strain_RNS08_42_1A_NZ_JMDL01000026	0	0	0	0
Buttiauxella_ferragutiae_ATCC_51602_NZ_LXEQ01000089	0	0	0	0
Kluyvera_georgiana_ATCC_51603_NZ_LXEU01000163	0	0	0	0
Klebsiella_aerogenes_KCTC_2190_NC_015663	0	0	0	0
Pantoea_ananatis_LMG_2665_NZ_JFZU01000028	0	0	0	0
Mangrovibacter_phragmitis_strain_MP23_NZ_LYRP01000050	0	0	0	0
Edwardsiella_hoshinae_NBRC_105699__ATCC_33379_NZ_BAUC01000001	0	0	0	0
Edwardsiella_tarda_strain_ET883_NZ_JRGQ01000167	0	0	0	0
Klebsiella_pneumoniae_subsp_ozaenae_NBRC_105683_NZ_BCZL01000154	0	0	0	0
Raoultella_ornithinolytica_NBRC_105727__ATCC_31898_NZ_BCYR01000035	0	0	0	0
Raoultella_planticola_ATCC_33531_NZ_JMPP01000083	0	0	0	0
Dickeya_chrysanthemi_NCPPB_402_NZ_AOOA01000077	0	0	0	0
Dickeya_dadantii_NCPPB_898_NZ_AOOE01000052	0	0	0	0
Dickeya_dianthicola_NCPPB_453_NZ_AOOB01000052	0	0	0	0
Dickeya_solani_IPO_2222_NZ_CP015137	0	0	0	0
Dickeya_zeae_NCPPB_2538_NZ_AOOF01000046	0	0	0	0
Pectobacterium_carotovorum_subsp_brasiliense_strain_LMG_21371_NZ_JQOE01000109	0	0	0	0
Serratia_odorifera_DSM_4582_NZ_GG753567	0	0	0	0
Citrobacter_sedlakii_NBRC_105722_NZ_BBNB01000001	0	0	0	0
Kluyvera_cryocrescens_NBRC_102467_NZ_BCTM01000101	0	0	0	0
Kluyvera_intermedia_NBRC_102594__ATCC_33110_NZ_BCYS01000109	0	0	0	0
Buttiauxella_brennerae_ATCC_51605_NZ_LXER01000088	0	0	0	0
Enterobacter_hormaechei_ATCC_49162_NZ_MKEQ01000003	0	0	0	0
Leclercia_adecarboxylata_ATCC_23216__NBRC_102595_NZ_BCNP01000071	0	0	0	0
Siccibacter_turicensis_LMG_23730_NZ_AWFZ01000075	0	0	0	0
Dickeya_paradisiaca_NCPPB_2511_NZ_CM001857	0	0	0	0
Pectobacterium_carotovorum_subsp_carotovorum_strain_NCPPB_312_NZ_JQHJ01000055	0	0	0	0
Salmonella_enterica_subsp_enterica_serovar_Typhimurium_str_LT2_NC_003197	0	0	0	0
Citrobacter_freundii_NBRC_12681_NZ_BBMV01000001	0	0	0	0
Serratia_plymuthica_NBRC_102599_NZ_BCTU01000078	0	0	0	0
Serratia_rubidaea_NBRC_103169_NZ_BCZJ01000029	0	0	0	0
Pectobacterium_carotovorum_subsp_odoriferum_strain_NCPPB_3839_NZ_JQOG01000156	0	0	0	0
Erwinia_iniecta_strain_B120_NZ_JRXE01000092	0	0	0	0
Erwinia_persicina_NBRC_102418_NZ_BCTN01000066	0	0	0	0
Escherichia_coli_DSM_30083__JCM_1649__ATCC_11775_NZ_KK583188	0	0	0	0
Citrobacter_rodentium_NBRC_105723_NZ_BBNA01000001	0	0	0	0
Citrobacter_werkmanii_NBRC_105721_NZ_BBMW01000001	0	0	0	0
Kosakonia_oryzae_strain_Ola_51_NZ_CP014007	0	0	0	0
Escherichia_fergusonii_ATCC_35469_strain_ATCC_35469T_NC_011740	0	0	0	0
Escherichia_albertii_TW07627_NZ_CH991859	0	0	0	0
Enterobacter_asburiae_strain_ATCC_35953_NZ_CP011863	0	0	0	0
Leminorella_grimontii_ATCC_33999__DSM_5078_NZ_JMPN01000057	0	0	0	0
Serratia_nematodiphila_DZ0503SBS1_strain_DSM_21420_NZ_JPUX01000002	0	0	0	0
Pantoea_stewartii_subsp_indologenes_strain_LMG_2632_NZ_JPKO01000034	0	0	0	0
Hafnia_paralvei_ATCC_29927_NZ_LXET01000086	0	0	0	0
Pantoea_agglomerans_NBRC_102470_NZ_BCZA01000025	0	0	0	0
Pectobacterium_betavasculorum_strain_NCPPB_2795_NZ_JQHM01000093	0	0	0	0
Pectobacterium_wasabiae_CFBP_3304_NZ_CP015750	0	0	0	0
Sodalis_praecaptivus_strain_HS1_NZ_CP006569	0	0	0	0
Moellerella_wisconsensis_ATCC_35017_NZ_LGAA01000108	0	0	0	0
Rahnella_aquatilis_CIP_78_65__ATCC_33071_NC_016818	0	0	0	0
Escherichia_vulneris_NBRC_102420_NZ_BBMZ01000001	0	0	0	0
Yersinia_entomophaga_strain_MH96_NZ_CP010029	0	0	0	0
Yersinia_pseudotuberculosis_NBRC_105692_NZ_BAUR01000001	0	0	0	0
Yersinia_rohdei_ATCC_43380_NZ_ACCD01000001	0	0	0	0
Buttiauxella_agrestis_ATCC_33320_NZ_JMPI01000093	0	0	0	0
Serratia_fonticola_strain_DSM_4576_NZ_CP011254	0	0	0	0
Cedecea_davisae_DSM_4568_NZ_KE161033	0	0	0	0
Salmonella_bongori_NCTC_12419_NC_015761	0	0	0	0
Budvicia_aquatica_DSM_5075__ATCC_35567_NZ_ATYS01000110	0	0	0	0
Yersinia_intermedia_ATCC_29909_NZ_AALF02000001	0	0	0	0
Serratia_liquefaciens_ATCC_27592_NC_021741	0	0	0	0
Serratia_ficaria_NBRC_102596_NZ_BCTS01000091	0	0	0	0
Serratia_grimesii_NBRC_13537_NZ_BCTT01000040	0	0	0	0
Yokenella_regensburgei_ATCC_49455_NZ_JMPS01000105	0	0	0	0
Citrobacter_pasteurii_strain_CIP_55_13_NZ_CDHL01000056	0	0	0	0
Rouxiella_chamberiensis_strain_130333_NZ_JRWU01000102	0	0	0	0
Kosakonia_sacchari_SP1_CP007215	0	0	0	0
Buttiauxella_gaviniae_ATCC_51604_NZ_LXEP01000133	0	0	0	0
Buttiauxella_noackiae_ATCC_51607_NZ_LXEO01000104	0	0	0	0
Plesiomonas_shigelloides_strain_NCTC10360_NZ_LT575468_chromosome_1	0	0	0	0
Hafnia_alvei_ATCC_13337_NZ_JMPK01000161	0	0	0	0
Lelliottia_amnigena_NBRC_105700_NZ_BCNN01000020	0	0	0	0
Erwinia_oleae_strain_DAPP_PG531_NZ_JNVB01000099	0	0	0	0
Arsenophonus_nasoniae_DSM_15247_NZ_AUCC01000302	0	0	0	0
Yersinia_enterocolitica_subsp_palearctica_Y11_NC_017564	0	0	0	0
Yersinia_similis_strain_228_NZ_CP007230	0	0	0	0
Yersinia_aldovae_ATCC_35236_NZ_ACCB01000001	0	0	0	0
Yersinia_aleksiciae_strain_159_NZ_CP011975	0	0	0	0
Yersinia_bercovieri_ATCC_43970_NZ_AALC02000001	0	0	0	0
Yersinia_enterocolitica_strain_ATCC_9610_NZ_KN150735	0	0	0	0
Yersinia_frederiksenii_ATCC_33641_NZ_KN150732	0	0	0	0
Yersinia_kristensenii_ATCC_33638_NZ_ACCA01000001	0	0	0	0
Yersinia_massiliensis_CCUG_53443_NZ_HE997664	0	0	0	0
Yersinia_mollaretii_ATCC_43969_NZ_AALD02000001	0	0	0	0
Yersinia_nurmii_strain_type_strain_CIP110231_NZ_CPYD01000045	0	0	0	0
Yersinia_pekkanenii_strain_type_strain_CIP110230_NZ_CWJL01000250	0	0	0	0
Serratia_marcescens_strain_CDC_813_60_NZ_KN050643	0	0	0	0
Lonsdalea_quercina_strain_ATCC_29281_NZ_FNQS01000022	0	0	0	0
Tatumella_ptyseos_ATCC_33301_NZ_ATMJ01000085	0	0	0	0
Erwinia_pyrifoliae_DSM_12163_NC_017390	0	0	0	0
Erwinia_tasmaniensis_Et1_99_NC_010694	0	0	0	0
Providencia_sneebia_DSM_19967_NZ_CM001773	0	0	0	0
Tatumella_morbirosei_strain_LMG_23360_NZ_JPKR02000005	0	0	0	0
Atlantibacter_hermannii_NBRC_105704_BAFF00000000	0	0	0	0
Cedecea_neteri_NBRC_105707__ATCC_33855_NZ_BCTL01000139	0	0	0	0
Cosenzaea_myxofaciens_ATCC_19692_NZ_LXEN01000293	0	0	0	0
Erwinia_amylovora_NBRC_12687_NZ_BAYW01000001	0	0	0	0
Erwinia_piriflorinigrans_CFBP_5888_NZ_CAHS01000025	0	0	0	0
Ewingella_americana_ATCC_33852_NZ_JMPJ01000092	0	0	0	0
Morganella_morganii_subsp_morganii_NBRC_3848_NZ_BCZU01000025	0	0	0	0
Pragia_fontium_DSM_5563__ATCC_49100_NZ_FOLW01000021	0	0	0	0
Proteus_hauseri_ATCC_700826_NZ_LXEV01000056	0	0	0	0
Proteus_mirabilis_ATCC_29906_NZ_GG668576	0	0	0	0
Providencia_alcalifaciens_DSM_30120_NZ_ABXW01000001	0	0	0	0
Providencia_burhodogranariea_DSM_19968_NZ_KB233229	0	0	0	0
Providencia_heimbachae_ATCC_35613_NZ_LXEW01000074	0	0	0	0
Providencia_rustigianii_DSM_4541_NZ_GG703817	0	0	0	0
Shimwellia_blattae_DSM_4481__NBRC_105725_NC_017910	0	0	0	0
Tatumella_saanichensis_strain_NML_06_3099_NZ_ATMI01000056	0	0	0	0
Trabulsiella_guamensis_ATCC_49490_NZ_JMTB01000278	0	0	0	0
Yersinia_ruckeri_ATCC_29473_NZ_KN150748	0	0	0	0

## Sheet: binary_alpha
Species	Alpha-galactosidase						Total genes
	alpha-galactosidase_G1	alpha-galactosidase_G2	alpha-galactosidase_G3	alpha-galactosidase_G4	alpha-galactosidase_G5	alpha-galactosidase_G6
Klebsiella_quasipneumoniae_subsp_quasipneumoniae_strain_01A030_NZ_CCDF01000065	1	0	0	1	1	0	3
Buttiauxella_ferragutiae_ATCC_51602_NZ_LXEQ01000089	1	0	1	1	0	0	3
Klebsiella_oxytoca_NBRC_105695_NZ_BCZK01000043	1	0	0	0	1	0	2
Klebsiella_pneumoniae_strain_ATCC_13883_NZ_KN046822	1	0	0	0	1	0	2
Klebsiella_quasipneumoniae_subsp_similipneumoniae_strain_07A044_NZ_CBZR010000046	1	0	0	0	1	0	2
Klebsiella_variicola_strain_DSM_15968_NZ_CP010523	1	0	0	0	1	0	2
Edwardsiella_ictaluri_ATCC_33202_NZ_AFJI01000117	1	0	0	0	0	1	2
Edwardsiella_tarda_ATCC_15947__NBRC_105688_NZ_BANW01000001	1	0	0	0	0	1	2
Klebsiella_pneumoniae_subsp_rhinoscleromatis_ATCC_13884_NZ_GG703522	1	0	0	0	1	0	2
Kluyvera_georgiana_ATCC_51603_NZ_LXEU01000163	1	0	0	1	0	0	2
Edwardsiella_hoshinae_NBRC_105699__ATCC_33379_NZ_BAUC01000001	1	0	0	0	0	1	2
Klebsiella_pneumoniae_subsp_ozaenae_NBRC_105683_NZ_BCZL01000154	1	0	0	0	1	0	2
Raoultella_ornithinolytica_NBRC_105727__ATCC_31898_NZ_BCYR01000035	1	0	0	0	1	0	2
Raoultella_planticola_ATCC_33531_NZ_JMPP01000083	1	0	0	0	1	0	2
Serratia_odorifera_DSM_4582_NZ_GG753567	1	1	0	0	0	0	2
Sodalis_praecaptivus_strain_HS1_NZ_CP006569	1	0	0	0	1	0	2
Moellerella_wisconsensis_ATCC_35017_NZ_LGAA01000108	1	0	0	0	1	0	2
Cronobacter_malonaticus_LMG_23826_NZ_CP013940	0	0	0	0	1	0	1
Cronobacter_sakazakii_strain_ATCC_29544_NZ_CP011047	0	0	0	0	1	0	1
Enterobacter_ludwigii_strain_EN_119_NZ_CP017279	0	0	0	0	1	0	1
Cronobacter_universalis_NCTC_9529_NZ_CP012257	0	0	0	0	1	0	1
Enterobacter_mori_LMG_25706_NZ_AEXB01000139	0	0	0	0	1	0	1
Kluyvera_ascorbata_ATCC_33433_NZ_JMPL01000253	1	0	0	0	0	0	1
Pluralibacter_gergoviae_ATCC_33028__NBRC_105706_NZ_BCZS01000104	0	0	0	0	1	0	1
Enterobacter_soli_ATCC_BAA_2102_NZ_LXES01000074	0	0	0	0	1	0	1
Cronobacter_dublinensis_subsp_dublinensis_LMG_23823_NZ_CP012266	0	0	0	0	1	0	1
Enterobacter_cloacae_subsp_cloacae_ATCC_13047_NC_014121	0	0	0	0	1	0	1
Cronobacter_condimenti_1330_NZ_CAKW01000001	0	0	0	0	1	0	1
Cronobacter_dublinensis_subsp_lactaridi_LMG_23825_NZ_AJKX01000095	0	0	0	0	1	0	1
Cronobacter_dublinensis_subsp_lausannensis_LMG_23824_NZ_AJKY01000105	0	0	0	0	1	0	1
Cronobacter_muytjensii_ATCC_51329_NZ_CP012268	0	0	0	0	1	0	1
Enterobacter_hormaechei_subsp_oharae_strain_DSM_16687_NZ_CP017180	0	0	0	0	1	0	1
Enterobacter_hormaechei_subsp_steigerwaltii_strain_DSM_16691_NZ_CP017179	0	0	0	0	1	0	1
Franconibacter_helveticus_LMG_23732_NZ_AWFX01000057	0	0	0	0	1	0	1
Franconibacter_pulveris_DSM_19144_NZ_JHYZ01000036	0	0	0	0	1	0	1
Pectobacterium_atrosepticum_strain_NCPPB_549_NZ_JQHK01000060	0	0	0	0	1	0	1
Pectobacterium_parmentieri_strain_RNS08_42_1A_NZ_JMDL01000026	0	0	0	0	1	0	1
Klebsiella_aerogenes_KCTC_2190_NC_015663	1	0	0	0	0	0	1
Pantoea_ananatis_LMG_2665_NZ_JFZU01000028	1	0	0	0	0	0	1
Mangrovibacter_phragmitis_strain_MP23_NZ_LYRP01000050	1	0	0	0	0	0	1
Edwardsiella_tarda_strain_ET883_NZ_JRGQ01000167	0	0	0	0	0	1	1
Dickeya_chrysanthemi_NCPPB_402_NZ_AOOA01000077	0	0	0	0	1	0	1
Dickeya_dadantii_NCPPB_898_NZ_AOOE01000052	0	0	0	0	1	0	1
Dickeya_dianthicola_NCPPB_453_NZ_AOOB01000052	0	0	0	0	1	0	1
Dickeya_solani_IPO_2222_NZ_CP015137	0	0	0	0	1	0	1
Dickeya_zeae_NCPPB_2538_NZ_AOOF01000046	0	0	0	0	1	0	1
Pectobacterium_carotovorum_subsp_brasiliense_strain_LMG_21371_NZ_JQOE01000109	0	0	0	0	1	0	1
Citrobacter_sedlakii_NBRC_105722_NZ_BBNB01000001	1	0	0	0	0	0	1
Kluyvera_cryocrescens_NBRC_102467_NZ_BCTM01000101	1	0	0	0	0	0	1
Kluyvera_intermedia_NBRC_102594__ATCC_33110_NZ_BCYS01000109	1	0	0	0	0	0	1
Buttiauxella_brennerae_ATCC_51605_NZ_LXER01000088	1	0	0	0	0	0	1
Enterobacter_kobei_strain_JCM_8580_MKXD00000000	0	0	0	0	1	0	1
Leclercia_adecarboxylata_ATCC_23216__NBRC_102595_NZ_BCNP01000071	0	0	0	0	1	0	1
Siccibacter_turicensis_LMG_23730_NZ_AWFZ01000075	0	0	0	0	1	0	1
Dickeya_paradisiaca_NCPPB_2511_NZ_CM001857	0	0	0	0	1	0	1
Pectobacterium_carotovorum_subsp_carotovorum_strain_NCPPB_312_NZ_JQHJ01000055	0	0	0	0	1	0	1
Salmonella_enterica_subsp_enterica_serovar_Typhimurium_str_LT2_NC_003197	1	0	0	0	0	0	1
Citrobacter_freundii_NBRC_12681_NZ_BBMV01000001	1	0	0	0	0	0	1
Serratia_plymuthica_NBRC_102599_NZ_BCTU01000078	1	0	0	0	0	0	1
Serratia_rubidaea_NBRC_103169_NZ_BCZJ01000029	1	0	0	0	0	0	1
Pectobacterium_carotovorum_subsp_odoriferum_strain_NCPPB_3839_NZ_JQOG01000156	1	0	0	0	0	0	1
Erwinia_iniecta_strain_B120_NZ_JRXE01000092	1	0	0	0	0	0	1
Erwinia_persicina_NBRC_102418_NZ_BCTN01000066	1	0	0	0	0	0	1
Escherichia_coli_DSM_30083__JCM_1649__ATCC_11775_NZ_KK583188	1	0	0	0	0	0	1
Rahnella_aquatilis_CIP_78_65__ATCC_33071_NC_016818	0	0	0	0	1	0	1
Escherichia_vulneris_NBRC_102420_NZ_BBMZ01000001	0	0	0	0	1	0	1
Yersinia_entomophaga_strain_MH96_NZ_CP010029	0	0	0	0	1	0	1
Yersinia_pseudotuberculosis_NBRC_105692_NZ_BAUR01000001	0	0	0	0	1	0	1
Yersinia_rohdei_ATCC_43380_NZ_ACCD01000001	0	0	0	0	1	0	1
Buttiauxella_agrestis_ATCC_33320_NZ_JMPI01000093	0	0	0	0	1	0	1
Serratia_fonticola_strain_DSM_4576_NZ_CP011254	0	0	0	0	1	0	1
Cedecea_davisae_DSM_4568_NZ_KE161033	0	0	1	0	0	0	1
Salmonella_bongori_NCTC_12419_NC_015761	1	0	0	0	0	0	1
Budvicia_aquatica_DSM_5075__ATCC_35567_NZ_ATYS01000110	1	0	0	0	0	0	1
Yersinia_intermedia_ATCC_29909_NZ_AALF02000001	1	0	0	0	0	0	1
Serratia_liquefaciens_ATCC_27592_NC_021741	1	0	0	0	0	0	1
Serratia_ficaria_NBRC_102596_NZ_BCTS01000091	1	0	0	0	0	0	1
Serratia_grimesii_NBRC_13537_NZ_BCTT01000040	1	0	0	0	0	0	1
Yokenella_regensburgei_ATCC_49455_NZ_JMPS01000105	1	0	0	0	0	0	1
Lelliottia_amnigena_NBRC_105700_NZ_BCNN01000020	0	0	0	0	1	0	1
Erwinia_oleae_strain_DAPP_PG531_NZ_JNVB01000099	0	1	0	0	0	0	1
Xenorhabdus_nematophila_ATCC_19061_NC_014228	0	0	0	0	0	0	0
Photorhabdus_luminescens_subsp_luminescens_strain_DSM_3368_NZ_JXSK01000015	0	0	0	0	0	0	0
Enterobacter_hormaechei_ATCC_49162_NZ_MKEQ01000003	0	0	0	0	0	0	0
Xenorhabdus_szentirmaii_DSM_16338_NZ_CBXF010000164	0	0	0	0	0	0	0
Xenorhabdus_thuongxuanensis_strain_30TX1_NZ_MKGR01000099	0	0	0	0	0	0	0
Photorhabdus_luminescens_subsp_laumondii_TTO1_NC_005126	0	0	0	0	0	0	0
Citrobacter_rodentium_NBRC_105723_NZ_BBNA01000001	0	0	0	0	0	0	0
Citrobacter_werkmanii_NBRC_105721_NZ_BBMW01000001	0	0	0	0	0	0	0
Kosakonia_oryzae_strain_Ola_51_NZ_CP014007	0	0	0	0	0	0	0
Escherichia_fergusonii_ATCC_35469_strain_ATCC_35469T_NC_011740	0	0	0	0	0	0	0
Escherichia_albertii_TW07627_NZ_CH991859	0	0	0	0	0	0	0
Enterobacter_asburiae_strain_ATCC_35953_NZ_CP011863	0	0	0	0	0	0	0
Leminorella_grimontii_ATCC_33999__DSM_5078_NZ_JMPN01000057	0	0	0	0	0	0	0
Serratia_nematodiphila_DZ0503SBS1_strain_DSM_21420_NZ_JPUX01000002	0	0	0	0	0	0	0
Pantoea_stewartii_subsp_indologenes_strain_LMG_2632_NZ_JPKO01000034	0	0	0	0	0	0	0
Hafnia_paralvei_ATCC_29927_NZ_LXET01000086	0	0	0	0	0	0	0
Pantoea_agglomerans_NBRC_102470_NZ_BCZA01000025	0	0	0	0	0	0	0
Pectobacterium_betavasculorum_strain_NCPPB_2795_NZ_JQHM01000093	0	0	0	0	0	0	0
Pectobacterium_wasabiae_CFBP_3304_NZ_CP015750	0	0	0	0	0	0	0
Photorhabdus_luminescens_strain_PB45_5_NZ_LOIC01000105	0	0	0	0	0	0	0
Photorhabdus_temperata_subsp_thracensis_strain_DSM_15199_NZ_CP011104	0	0	0	0	0	0	0
Citrobacter_pasteurii_strain_CIP_55_13_NZ_CDHL01000056	0	0	0	0	0	0	0
Rouxiella_chamberiensis_strain_130333_NZ_JRWU01000102	0	0	0	0	0	0	0
Kosakonia_sacchari_SP1_CP007215	0	0	0	0	0	0	0
Buttiauxella_gaviniae_ATCC_51604_NZ_LXEP01000133	0	0	0	0	0	0	0
Buttiauxella_noackiae_ATCC_51607_NZ_LXEO01000104	0	0	0	0	0	0	0
Plesiomonas_shigelloides_strain_NCTC10360_NZ_LT575468_chromosome_1	0	0	0	0	0	0	0
Hafnia_alvei_ATCC_13337_NZ_JMPK01000161	0	0	0	0	0	0	0
Xenorhabdus_doucetiae_strain_FRM16_NZ_FO704550	0	0	0	0	0	0	0
Photorhabdus_asymbiotica_subsp_australis_DSM_17609_NZ_JONO01000141	0	0	0	0	0	0	0
Xenorhabdus_eapokensis_strain_DL20_NZ_MKGQ01000099	0	0	0	0	0	0	0
Arsenophonus_nasoniae_DSM_15247_NZ_AUCC01000302	0	0	0	0	0	0	0
Yersinia_enterocolitica_subsp_palearctica_Y11_NC_017564	0	0	0	0	0	0	0
Yersinia_similis_strain_228_NZ_CP007230	0	0	0	0	0	0	0
Yersinia_aldovae_ATCC_35236_NZ_ACCB01000001	0	0	0	0	0	0	0
Yersinia_aleksiciae_strain_159_NZ_CP011975	0	0	0	0	0	0	0
Yersinia_bercovieri_ATCC_43970_NZ_AALC02000001	0	0	0	0	0	0	0
Yersinia_enterocolitica_strain_ATCC_9610_NZ_KN150735	0	0	0	0	0	0	0
Yersinia_frederiksenii_ATCC_33641_NZ_KN150732	0	0	0	0	0	0	0
Yersinia_kristensenii_ATCC_33638_NZ_ACCA01000001	0	0	0	0	0	0	0
Yersinia_massiliensis_CCUG_53443_NZ_HE997664	0	0	0	0	0	0	0
Yersinia_mollaretii_ATCC_43969_NZ_AALD02000001	0	0	0	0	0	0	0
Yersinia_nurmii_strain_type_strain_CIP110231_NZ_CPYD01000045	0	0	0	0	0	0	0
Yersinia_pekkanenii_strain_type_strain_CIP110230_NZ_CWJL01000250	0	0	0	0	0	0	0
Serratia_marcescens_strain_CDC_813_60_NZ_KN050643	0	0	0	0	0	0	0
Lonsdalea_quercina_strain_ATCC_29281_NZ_FNQS01000022	0	0	0	0	0	0	0
Tatumella_ptyseos_ATCC_33301_NZ_ATMJ01000085	0	0	0	0	0	0	0
Erwinia_pyrifoliae_DSM_12163_NC_017390	0	0	0	0	0	0	0
Erwinia_tasmaniensis_Et1_99_NC_010694	0	0	0	0	0	0	0
Providencia_sneebia_DSM_19967_NZ_CM001773	0	0	0	0	0	0	0
Tatumella_morbirosei_strain_LMG_23360_NZ_JPKR02000005	0	0	0	0	0	0	0
Atlantibacter_hermannii_NBRC_105704_BAFF00000000	0	0	0	0	0	0	0
Cedecea_neteri_NBRC_105707__ATCC_33855_NZ_BCTL01000139	0	0	0	0	0	0	0
Cosenzaea_myxofaciens_ATCC_19692_NZ_LXEN01000293	0	0	0	0	0	0	0
Erwinia_amylovora_NBRC_12687_NZ_BAYW01000001	0	0	0	0	0	0	0
Erwinia_piriflorinigrans_CFBP_5888_NZ_CAHS01000025	0	0	0	0	0	0	0
Ewingella_americana_ATCC_33852_NZ_JMPJ01000092	0	0	0	0	0	0	0
Morganella_morganii_subsp_morganii_NBRC_3848_NZ_BCZU01000025	0	0	0	0	0	0	0
Pragia_fontium_DSM_5563__ATCC_49100_NZ_FOLW01000021	0	0	0	0	0	0	0
Proteus_hauseri_ATCC_700826_NZ_LXEV01000056	0	0	0	0	0	0	0
Proteus_mirabilis_ATCC_29906_NZ_GG668576	0	0	0	0	0	0	0
Providencia_alcalifaciens_DSM_30120_NZ_ABXW01000001	0	0	0	0	0	0	0
Providencia_burhodogranariea_DSM_19968_NZ_KB233229	0	0	0	0	0	0	0
Providencia_heimbachae_ATCC_35613_NZ_LXEW01000074	0	0	0	0	0	0	0
Providencia_rustigianii_DSM_4541_NZ_GG703817	0	0	0	0	0	0	0
Shimwellia_blattae_DSM_4481__NBRC_105725_NC_017910	0	0	0	0	0	0	0
Tatumella_saanichensis_strain_NML_06_3099_NZ_ATMI01000056	0	0	0	0	0	0	0
Trabulsiella_guamensis_ATCC_49490_NZ_JMTB01000278	0	0	0	0	0	0	0
Yersinia_ruckeri_ATCC_29473_NZ_KN150748	0	0	0	0	0	0	0

## Sheet: binary_saponin
Species	Saponin metabolic related gene (beta-glucuronidase)
Escherichia_coli_DSM_30083__JCM_1649__ATCC_11775_NZ_KK583188	1
Edwardsiella_ictaluri_ATCC_33202_NZ_AFJI01000117	1
Edwardsiella_tarda_ATCC_15947__NBRC_105688_NZ_BANW01000001	1
Pantoea_ananatis_LMG_2665_NZ_JFZU01000028	1
Cronobacter_dublinensis_subsp_dublinensis_LMG_23823_NZ_CP012266	0
Cronobacter_malonaticus_LMG_23826_NZ_CP013940	0
Cronobacter_sakazakii_strain_ATCC_29544_NZ_CP011047	0
Cronobacter_universalis_NCTC_9529_NZ_CP012257	0
Enterobacter_asburiae_strain_ATCC_35953_NZ_CP011863	0
Enterobacter_cloacae_subsp_cloacae_ATCC_13047_NC_014121	0
Enterobacter_hormaechei_ATCC_49162_NZ_MKEQ01000003	0
Enterobacter_kobei_strain_JCM_8580_MKXD00000000	0
Enterobacter_ludwigii_strain_EN_119_NZ_CP017279	0
Erwinia_pyrifoliae_DSM_12163_NC_017390	0
Erwinia_tasmaniensis_Et1_99_NC_010694	0
Escherichia_fergusonii_ATCC_35469_strain_ATCC_35469T_NC_011740	0
Pantoea_stewartii_subsp_indologenes_strain_LMG_2632_NZ_JPKO01000034	0
Providencia_sneebia_DSM_19967_NZ_CM001773	0
Rahnella_aquatilis_CIP_78_65__ATCC_33071_NC_016818	0
Salmonella_enterica_subsp_enterica_serovar_Typhimurium_str_LT2_NC_003197	0
Serratia_liquefaciens_ATCC_27592_NC_021741	0
Sodalis_praecaptivus_strain_HS1_NZ_CP006569	0
Tatumella_morbirosei_strain_LMG_23360_NZ_JPKR02000005	0
Xenorhabdus_doucetiae_strain_FRM16_NZ_FO704550	0
Xenorhabdus_nematophila_ATCC_19061_NC_014228	0
Yersinia_enterocolitica_subsp_palearctica_Y11_NC_017564	0
Yersinia_similis_strain_228_NZ_CP007230	0
Arsenophonus_nasoniae_DSM_15247_NZ_AUCC01000302	0
Atlantibacter_hermannii_NBRC_105704_BAFF00000000	0
Budvicia_aquatica_DSM_5075__ATCC_35567_NZ_ATYS01000110	0
Buttiauxella_agrestis_ATCC_33320_NZ_JMPI01000093	0
Buttiauxella_brennerae_ATCC_51605_NZ_LXER01000088	0
Buttiauxella_ferragutiae_ATCC_51602_NZ_LXEQ01000089	0
Buttiauxella_gaviniae_ATCC_51604_NZ_LXEP01000133	0
Buttiauxella_noackiae_ATCC_51607_NZ_LXEO01000104	0
Cedecea_davisae_DSM_4568_NZ_KE161033	0
Cedecea_neteri_NBRC_105707__ATCC_33855_NZ_BCTL01000139	0
Citrobacter_freundii_NBRC_12681_NZ_BBMV01000001	0
Citrobacter_pasteurii_strain_CIP_55_13_NZ_CDHL01000056	0
Citrobacter_rodentium_NBRC_105723_NZ_BBNA01000001	0
Citrobacter_sedlakii_NBRC_105722_NZ_BBNB01000001	0
Citrobacter_werkmanii_NBRC_105721_NZ_BBMW01000001	0
Cosenzaea_myxofaciens_ATCC_19692_NZ_LXEN01000293	0
Cronobacter_condimenti_1330_NZ_CAKW01000001	0
Cronobacter_dublinensis_subsp_lactaridi_LMG_23825_NZ_AJKX01000095	0
Cronobacter_dublinensis_subsp_lausannensis_LMG_23824_NZ_AJKY01000105	0
Cronobacter_muytjensii_ATCC_51329_NZ_CP012268	0
Dickeya_chrysanthemi_NCPPB_402_NZ_AOOA01000077	0
Dickeya_dadantii_NCPPB_898_NZ_AOOE01000052	0
Dickeya_dianthicola_NCPPB_453_NZ_AOOB01000052	0
Dickeya_paradisiaca_NCPPB_2511_NZ_CM001857	0
Dickeya_solani_IPO_2222_NZ_CP015137	0
Dickeya_zeae_NCPPB_2538_NZ_AOOF01000046	0
Edwardsiella_hoshinae_NBRC_105699__ATCC_33379_NZ_BAUC01000001	0
Edwardsiella_tarda_strain_ET883_NZ_JRGQ01000167	0
Enterobacter_hormaechei_subsp_oharae_strain_DSM_16687_NZ_CP017180	0
Enterobacter_hormaechei_subsp_steigerwaltii_strain_DSM_16691_NZ_CP017179	0
Enterobacter_mori_LMG_25706_NZ_AEXB01000139	0
Enterobacter_soli_ATCC_BAA_2102_NZ_LXES01000074	0
Erwinia_amylovora_NBRC_12687_NZ_BAYW01000001	0
Erwinia_iniecta_strain_B120_NZ_JRXE01000092	0
Erwinia_oleae_strain_DAPP_PG531_NZ_JNVB01000099	0
Erwinia_persicina_NBRC_102418_NZ_BCTN01000066	0
Erwinia_piriflorinigrans_CFBP_5888_NZ_CAHS01000025	0
Escherichia_albertii_TW07627_NZ_CH991859	0
Escherichia_vulneris_NBRC_102420_NZ_BBMZ01000001	0
Ewingella_americana_ATCC_33852_NZ_JMPJ01000092	0
Franconibacter_helveticus_LMG_23732_NZ_AWFX01000057	0
Franconibacter_pulveris_DSM_19144_NZ_JHYZ01000036	0
Hafnia_alvei_ATCC_13337_NZ_JMPK01000161	0
Hafnia_paralvei_ATCC_29927_NZ_LXET01000086	0
Klebsiella_aerogenes_KCTC_2190_NC_015663	0
Klebsiella_oxytoca_NBRC_105695_NZ_BCZK01000043	0
Klebsiella_pneumoniae_strain_ATCC_13883_NZ_KN046822	0
Klebsiella_pneumoniae_subsp_ozaenae_NBRC_105683_NZ_BCZL01000154	0
Klebsiella_pneumoniae_subsp_rhinoscleromatis_ATCC_13884_NZ_GG703522	0
Klebsiella_quasipneumoniae_subsp_quasipneumoniae_strain_01A030_NZ_CCDF01000065	0
Klebsiella_quasipneumoniae_subsp_similipneumoniae_strain_07A044_NZ_CBZR010000046	0
Klebsiella_variicola_strain_DSM_15968_NZ_CP010523	0
Kluyvera_ascorbata_ATCC_33433_NZ_JMPL01000253	0
Kluyvera_cryocrescens_NBRC_102467_NZ_BCTM01000101	0
Kluyvera_georgiana_ATCC_51603_NZ_LXEU01000163	0
Kluyvera_intermedia_NBRC_102594__ATCC_33110_NZ_BCYS01000109	0
Kosakonia_oryzae_strain_Ola_51_NZ_CP014007	0
Kosakonia_sacchari_SP1_CP007215	0
Leclercia_adecarboxylata_ATCC_23216__NBRC_102595_NZ_BCNP01000071	0
Lelliottia_amnigena_NBRC_105700_NZ_BCNN01000020	0
Leminorella_grimontii_ATCC_33999__DSM_5078_NZ_JMPN01000057	0
Lonsdalea_quercina_strain_ATCC_29281_NZ_FNQS01000022	0
Mangrovibacter_phragmitis_strain_MP23_NZ_LYRP01000050	0
Moellerella_wisconsensis_ATCC_35017_NZ_LGAA01000108	0
Morganella_morganii_subsp_morganii_NBRC_3848_NZ_BCZU01000025	0
Pantoea_agglomerans_NBRC_102470_NZ_BCZA01000025	0
Pectobacterium_atrosepticum_strain_NCPPB_549_NZ_JQHK01000060	0
Pectobacterium_betavasculorum_strain_NCPPB_2795_NZ_JQHM01000093	0
Pectobacterium_carotovorum_subsp_brasiliense_strain_LMG_21371_NZ_JQOE01000109	0
Pectobacterium_carotovorum_subsp_carotovorum_strain_NCPPB_312_NZ_JQHJ01000055	0
Pectobacterium_carotovorum_subsp_odoriferum_strain_NCPPB_3839_NZ_JQOG01000156	0
Pectobacterium_parmentieri_strain_RNS08_42_1A_NZ_JMDL01000026	0
Pectobacterium_wasabiae_CFBP_3304_NZ_CP015750	0
Plesiomonas_shigelloides_strain_NCTC10360_NZ_LT575468_chromosome_1	0
Pluralibacter_gergoviae_ATCC_33028__NBRC_105706_NZ_BCZS01000104	0
Pragia_fontium_DSM_5563__ATCC_49100_NZ_FOLW01000021	0
Proteus_hauseri_ATCC_700826_NZ_LXEV01000056	0
Proteus_mirabilis_ATCC_29906_NZ_GG668576	0
Providencia_alcalifaciens_DSM_30120_NZ_ABXW01000001	0
Providencia_burhodogranariea_DSM_19968_NZ_KB233229	0
Providencia_heimbachae_ATCC_35613_NZ_LXEW01000074	0
Providencia_rustigianii_DSM_4541_NZ_GG703817	0
Photorhabdus_asymbiotica_subsp_australis_DSM_17609_NZ_JONO01000141	0
Photorhabdus_luminescens_strain_PB45_5_NZ_LOIC01000105	0
Photorhabdus_luminescens_subsp_laumondii_TTO1_NC_005126	0
Photorhabdus_luminescens_subsp_luminescens_strain_DSM_3368_NZ_JXSK01000015	0
Photorhabdus_temperata_subsp_thracensis_strain_DSM_15199_NZ_CP011104	0
Raoultella_ornithinolytica_NBRC_105727__ATCC_31898_NZ_BCYR01000035	0
Raoultella_planticola_ATCC_33531_NZ_JMPP01000083	0
Rouxiella_chamberiensis_strain_130333_NZ_JRWU01000102	0
Salmonella_bongori_NCTC_12419_NC_015761	0
Serratia_ficaria_NBRC_102596_NZ_BCTS01000091	0
Serratia_fonticola_strain_DSM_4576_NZ_CP011254	0
Serratia_grimesii_NBRC_13537_NZ_BCTT01000040	0
Serratia_marcescens_strain_CDC_813_60_NZ_KN050643	0
Serratia_nematodiphila_DZ0503SBS1_strain_DSM_21420_NZ_JPUX01000002	0
Serratia_odorifera_DSM_4582_NZ_GG753567	0
Serratia_plymuthica_NBRC_102599_NZ_BCTU01000078	0
Serratia_rubidaea_NBRC_103169_NZ_BCZJ01000029	0
Shimwellia_blattae_DSM_4481__NBRC_105725_NC_017910	0
Siccibacter_turicensis_LMG_23730_NZ_AWFZ01000075	0
Tatumella_ptyseos_ATCC_33301_NZ_ATMJ01000085	0
Tatumella_saanichensis_strain_NML_06_3099_NZ_ATMI01000056	0
Trabulsiella_guamensis_ATCC_49490_NZ_JMTB01000278	0
Xenorhabdus_eapokensis_strain_DL20_NZ_MKGQ01000099	0
Xenorhabdus_szentirmaii_DSM_16338_NZ_CBXF010000164	0
Xenorhabdus_thuongxuanensis_strain_30TX1_NZ_MKGR01000099	0
Yersinia_aldovae_ATCC_35236_NZ_ACCB01000001	0
Yersinia_aleksiciae_strain_159_NZ_CP011975	0
Yersinia_bercovieri_ATCC_43970_NZ_AALC02000001	0
Yersinia_enterocolitica_strain_ATCC_9610_NZ_KN150735	0
Yersinia_entomophaga_strain_MH96_NZ_CP010029	0
Yersinia_frederiksenii_ATCC_33641_NZ_KN150732	0
Yersinia_intermedia_ATCC_29909_NZ_AALF02000001	0
Yersinia_kristensenii_ATCC_33638_NZ_ACCA01000001	0
Yersinia_massiliensis_CCUG_53443_NZ_HE997664	0
Yersinia_mollaretii_ATCC_43969_NZ_AALD02000001	0
Yersinia_nurmii_strain_type_strain_CIP110231_NZ_CPYD01000045	0
Yersinia_pekkanenii_strain_type_strain_CIP110230_NZ_CWJL01000250	0
Yersinia_pseudotuberculosis_NBRC_105692_NZ_BAUR01000001	0
Yersinia_rohdei_ATCC_43380_NZ_ACCD01000001	0
Yersinia_ruckeri_ATCC_29473_NZ_KN150748	0
Yokenella_regensburgei_ATCC_49455_NZ_JMPS01000105	0
